# Supplementary material for: Risk predictors of progression to severe disease during the febrile phase of dengue: a systematic review and meta-analysis
Source: PubMed Central journal article supplement (PMC8240557; doi:10.1016/s1473-3099(20)30601-0), 2021-07
Supplement: mmc1.pdf [file mmc1.pdf]

# THE LANCET

## Infectious Diseases

### **Supplementary appendix**

This appendix formed part of the original submission and has been peer reviewed. We post it as supplied by the authors.

Supplement to: Sangkaew S, Ming D, Boonyasiri A, et al. Risk predictors of progression to severe disease during the febrile phase of dengue: a systematic review and meta-analysis. *Lancet Infect Dis* 2021; published online Feb 25. [https://doi.org/10.1016/S1473-3099\(20\)30601-0](https://doi.org/10.1016/S1473-3099(20)30601-0).

1 **Supplement table 1: Search terms used in the literature review. We searched for all combinations of the**  
 2 **terms in column 1 and 2 (e.g. “dengue shock syndrome AND risk factor(s)”, “dengue shock syndrome**  
 3 **AND risk parameter(s)”, “dengue shock syndrome AND risk variable(s)”, “dengue shock AND risk**  
 4 **factor(s)” etc).**

| Complicated dengue                                                                                                                                                                                  | Predictors                                                                                                                                                                                                                                                                                                                                              |
|-----------------------------------------------------------------------------------------------------------------------------------------------------------------------------------------------------|---------------------------------------------------------------------------------------------------------------------------------------------------------------------------------------------------------------------------------------------------------------------------------------------------------------------------------------------------------|
| - dengue shock syndrome- dengue shock<br>- dengue haemorrhagic fever/dengue<br>- hemorrhagic fever<br>- dengue with warning sign(s)<br>- severe dengue<br>- complicated dengue<br>- dengue severity | - risk factor(s)<br>- risk parameter(s)<br>- risk variable(s)<br>- predictive/predicting factor(s)<br>- predictive/predicting parameter(s)<br>- prognostic factor(s)<br>- prognostic parameter(s)<br>- Associated factor(s)<br>- Associated parameter(s)<br>- Associated characteristic(s)<br>- Risk(s)<br>- Prognosis<br>- Biomarker(s)<br>- Marker(s) |

5  
 6 **Supplement table 2: Search syntaxes applied in the Ovid platform for searching MEDLINE database. We**  
 7 **searched for all combinations of the terms in column 1 and 2. The explode command (exp) was used to**  
 8 **retrieve records that contained the specific term and its subheadings (e.g. Severe dengue, risk factors, and**  
 9 **prognosis). Terms in the columns were search using multiple-purpose command (.mp), searching**  
 10 **keywords in a set of fields usually including Title, Original Title, Abstract, and Subject Heading.**

11

| 1. Terms for dengue with progression to severe disease                                                                                                                                                                                                                                                  | 2. Terms for predictors                                                                                                                                                                                                                                                                                                                                                                                                                                                                             |
|---------------------------------------------------------------------------------------------------------------------------------------------------------------------------------------------------------------------------------------------------------------------------------------------------------|-----------------------------------------------------------------------------------------------------------------------------------------------------------------------------------------------------------------------------------------------------------------------------------------------------------------------------------------------------------------------------------------------------------------------------------------------------------------------------------------------------|
| 1. [exp Severe Dengue/]<br>2. severe dengue.mp.<br>3. dengue shock syndrome*.mp.<br>4. dengue h?emorrhagic fever.mp<br>5. dengue with warning sign*.mp.<br>6. dengue severity.mp.<br>7. dengue death.mp.<br>8. dengue death.mp.<br>9. dengue shock.mp.<br>10. 1 or 2 or 3 or 4 or 5 or 6 or 7 or 8 or 9 | 11. [exp Risk Factors/]<br>12. risk factor*.mp.<br>13. [exp RISK/]<br>14. risk*.mp.<br>15. [exp PROGNOSIS/]<br>16. prognosis.mp.<br>17. [exp BIOMARKERS/]<br>18. biomarker*.mp.<br>19. marker*.mp.<br>20. ((risk* or predictive or prognostic or associated) adj (factor* or parameter* or characteristic* or variable*)).mp. [mp=title, abstract, full text, caption text]<br>21. predictor*.mp.<br>22. prediction.mp.<br>23. 11 or 12 or 13 or 14 or 15 or 16 or 17 or 18 or 19 or 20 or 21 or 22 |
| 10 AND 23                                                                                                                                                                                                                                                                                               |                                                                                                                                                                                                                                                                                                                                                                                                                                                                                                     |

12

13 **Supplement table 2: Template used to assess the eligibility criteria.**

|                       |                                                                                                                                                                                                                                                                                                                                                                                                                                                                                                                                            |
|-----------------------|--------------------------------------------------------------------------------------------------------------------------------------------------------------------------------------------------------------------------------------------------------------------------------------------------------------------------------------------------------------------------------------------------------------------------------------------------------------------------------------------------------------------------------------------|
| Reviewer name:        | Date:                                                                                                                                                                                                                                                                                                                                                                                                                                                                                                                                      |
| Author name/Study ID: | Year:                                                                                                                                                                                                                                                                                                                                                                                                                                                                                                                                      |
| Title                 | Journal:                                                                                                                                                                                                                                                                                                                                                                                                                                                                                                                                   |
| Study designs         | <p><b>Include</b></p> <ul style="list-style-type: none"> <li><input type="checkbox"/> Original papers</li> <li><input type="checkbox"/> Research in human</li> </ul> <p><b>Exclude</b></p> <ul style="list-style-type: none"> <li><input type="checkbox"/> Descriptive studies (case reports, case studies), Sero-epidemiological studies, ecological or mathematical modelling studies</li> </ul>                                                                                                                                         |
| Population            | <p><b>Include</b></p> <ul style="list-style-type: none"> <li><input type="checkbox"/> Symptomatic infected individuals in the febrile phase <b>AND</b></li> <li><input type="checkbox"/> Laboratory confirmed dengue diagnosis according to WHO Dengue Guideline in 1997 and 2009*</li> </ul> <p><b>Exclude</b></p> <ul style="list-style-type: none"> <li><input type="checkbox"/> Individuals who had developed clinical manifestation of severe dengue (severe plasma leakage, hemodynamic instability and organ impairment)</li> </ul> |
| Exposure(s)           | <p><b>Include</b></p> <ul style="list-style-type: none"> <li><input type="checkbox"/> Demographic features, clinical manifestations (signs and symptoms), laboratory parameters, or imaging techniques <b>AND</b></li> <li><input type="checkbox"/> Parameters collected during the febrile phase</li> </ul> <p><b>Exclude</b></p> <ul style="list-style-type: none"> <li><input type="checkbox"/> Genetic factors or gene expression</li> </ul>                                                                                           |
| Outcome(s)            | <p><b>Include</b></p> <ul style="list-style-type: none"> <li><input type="checkbox"/> Association between predictors and risk of development severe clinical manifestations of dengue infection according to WHO guideline (dengue haemorrhagic fever grade I-IV, dengue shock syndrome, and severe dengue) compared with dengue fever</li> </ul>                                                                                                                                                                                          |

|                 |                                                                                    |
|-----------------|------------------------------------------------------------------------------------|
| <b>Overall:</b> | <input type="checkbox"/> <b>Include</b><br><input type="checkbox"/> <b>Exclude</b> |
|-----------------|------------------------------------------------------------------------------------|

15 **Supplement Table 3: Template used for extracting information from the studies included in the systematic**  
 16 **review.**

|                                                                                                   |
|---------------------------------------------------------------------------------------------------|
| <b>Paper ID</b>                                                                                   |
| <b>Title</b>                                                                                      |
| <b>Reviews</b>                                                                                    |
| <b>First author's surname</b>                                                                     |
| <b>Year of publication</b>                                                                        |
| <b>Study design</b>                                                                               |
| <b>Data collection</b>                                                                            |
| <b>Year of patient recruitment</b> (Month/Year - Month/year)                                      |
| <b>Country</b> where patients were recruited                                                      |
| <b>Hospital/centre</b> names where patient were recruited                                         |
| <b>Population</b> inclusion and exclusion criteria                                                |
| <b>Dengue classification</b><br>1: WHO 1997 (DS, DHF, and DSS)<br>2: WHO 2009 (DWS-, DWS+,and SD) |
| When were samples or information collected                                                        |
| <b>Reference group</b> (e.g. a DF group)                                                          |
| <b>Comparative group</b> (i.e. DHF, DSS, DHF/DSS, DWS+/SD, or SD)                                 |
| <b>Continuous factors</b> _1 name (unit)                                                          |
| Description (if applicability)                                                                    |
| How were samples or information measured (if applicable)                                          |
| Sample size of a reference groups                                                                 |
| Sample size of a comparative group                                                                |
| Ref: Mean, Median, Mean difference                                                                |
| Ref: SD, Upper 95% CI, Lower 95% CI, IQR, Upper IQR, Lower IQR                                    |
| Ref: Odds ratio, Relative risk, Adjusted odds ration, Adjusted relative risk                      |
| Ref: 95% CI of OR                                                                                 |
| Comp: Mean, Median, Mean difference                                                               |
| Comp: SD, Upper 95% CI, Lower 95% CI, IQR, Upper IQR, Lower IQR                                   |
| P-value                                                                                           |
| Statistic test                                                                                    |
| Comp: Odds ratio, Relative risk, Adjusted odds ratio, Adjusted relative risk                      |
| Comp: 95% CI of OR                                                                                |
| P-value                                                                                           |
| Statistic test                                                                                    |
| Adjusted variables                                                                                |
| <b>Categorical factors</b> _1 name (unit):                                                        |
| Description (if necessary)                                                                        |
| How were samples or information measured (if necessary)                                           |
| Sample size of a reference groups                                                                 |
| Sample size of a comparative group                                                                |

|                                                                              |
|------------------------------------------------------------------------------|
| Level 1: The number of non-events (in reference group)                       |
| Level 1: The number of events (in comparison group)                          |
| Level 2: The number of non-events (in reference group)                       |
| Level 2: The number of events (in comparison group)                          |
| Level 3: The number of non-events (in reference group)                       |
| Level 3: The number of events (in comparison group)                          |
| P-value                                                                      |
| Statistic test                                                               |
| Comp: Odds ratio, Relative risk, Adjusted odds ratio, Adjusted relative risk |
| Comp: Upper 95% CI                                                           |
| Comp: Lower 95% CI                                                           |
| Comp: Odds ratio, Relative risk, Adjusted odds ratio, Adjusted relative risk |
| Comp: Upper 95% CI                                                           |
| Comp: Lower 95% CI                                                           |
| P-value                                                                      |
| Statistic test                                                               |

17

18 **Supplement Table 5. Definitions of progression to severe disease taken from the included studies in this**  
19 **systematic review and meta-analysis**

| Terminology                                                | Definitions                                                                                                                                                                                                                                                                                                                                                                                                                                                                |
|------------------------------------------------------------|----------------------------------------------------------------------------------------------------------------------------------------------------------------------------------------------------------------------------------------------------------------------------------------------------------------------------------------------------------------------------------------------------------------------------------------------------------------------------|
| Definition A (based on DHF in the 1997 WHO Classification) | Thrombocytopenia                                                                                                                                                                                                                                                                                                                                                                                                                                                           |
|                                                            | <ul style="list-style-type: none"> <li>- A platelet count less than 100,000 cells/micro litre</li> </ul>                                                                                                                                                                                                                                                                                                                                                                   |
|                                                            | <p>and</p> <p>Plasma leakage</p> <ul style="list-style-type: none"> <li>- Haematocrit rising 20% from baseline haematocrit, haematocrit levels measured during the first 96 hours of illness, average haematocrit levels based on population data</li> </ul> <p>OR</p> <ul style="list-style-type: none"> <li>- Fluid accumulation by chest X-ray, ultrasonography, or physical examinations (depending on health facility and completeness of medical records)</li> </ul> |
|                                                            | and                                                                                                                                                                                                                                                                                                                                                                                                                                                                        |

|                                                                   |                                                                                                                                                                                                                                                                                                                                                                                                                                                                                                                                                                                                                                                                                                                                                                                         |
|-------------------------------------------------------------------|-----------------------------------------------------------------------------------------------------------------------------------------------------------------------------------------------------------------------------------------------------------------------------------------------------------------------------------------------------------------------------------------------------------------------------------------------------------------------------------------------------------------------------------------------------------------------------------------------------------------------------------------------------------------------------------------------------------------------------------------------------------------------------------------|
|                                                                   | <p>Haemorrhagic tendencies</p> <ul style="list-style-type: none"> <li>- Presence of spontaneous bleeding</li> </ul> <p>OR</p> <ul style="list-style-type: none"> <li>- Mucosal bleeding including positive tourniquet test</li> </ul>                                                                                                                                                                                                                                                                                                                                                                                                                                                                                                                                                   |
| <p>Definition B (based on DSS in the 1997 WHO Classification)</p> | <p>Shock</p> <ul style="list-style-type: none"> <li>- Narrow pulse pressure less than 20 mmHg</li> </ul> <p>OR</p> <ul style="list-style-type: none"> <li>- Systolic blood pressure less than 90 mmHg (or hypotension in accordance with the sex and age specific reference of population data)</li> </ul> <p>OR</p> <ul style="list-style-type: none"> <li>- Poor tissue perfusion such as clammy skin, urine output less than 0.5 ml/kg/hr</li> </ul>                                                                                                                                                                                                                                                                                                                                 |
| <p>Definition C (based on SD in the 2009 WHO Classification)</p>  | <p>Severe plasma leakage</p> <ul style="list-style-type: none"> <li>- Plasma leakage resulting in shock, defined as <ul style="list-style-type: none"> <li>- Narrow pulse pressure less than 20 mmHg</li> </ul> </li> </ul> <p>OR</p> <ul style="list-style-type: none"> <li>- Systolic blood pressure less than 90 mmHg (or hypotension in accordance with the sex and age specific reference of population data)</li> </ul> <p>OR</p> <ul style="list-style-type: none"> <li>- Poor tissue perfusion such as clammy skin, urine output less than 0.5 ml/kg/hr</li> </ul> <ul style="list-style-type: none"> <li>- Plasma leakage resulting in respiratory distress <ul style="list-style-type: none"> <li>- Evidence of pleural effusion or ascites</li> </ul> </li> </ul> <p>AND</p> |

|  |                                                                                                                                                                                                                                                                                                                                                               |
|--|---------------------------------------------------------------------------------------------------------------------------------------------------------------------------------------------------------------------------------------------------------------------------------------------------------------------------------------------------------------|
|  | <ul style="list-style-type: none"> <li>- Clinical indicators of respiratory distress such as tachypnoea or low oxygen saturations.</li> </ul>                                                                                                                                                                                                                 |
|  | <p>OR</p> <p>Severe clinical bleeding</p> <ul style="list-style-type: none"> <li>- Bleeding in vital organs</li> <li>- Spontaneous bleeding from a mucosal area with indication for blood transfusion</li> </ul>                                                                                                                                              |
|  | <p>OR</p> <p>Severe organ involvement</p> <ul style="list-style-type: none"> <li>- Aspartate aminotransferase (AST) level &gt;1,000 units/litre,</li> <li>- Alanine aminotransferase (ALT) level &gt;1,000 units/litre,</li> <li>- Serum creatinine level equal or more than 3 times above baseline</li> <li>- Myocarditis</li> <li>- Encephalitis</li> </ul> |

20

21



**Supplement Table 6: Publications included in the systematic review and meta-analysis**

| <b>Number</b> | <b>First author's name<br/>(Publication year)</b> | <b>Countries</b>                                                           | <b>Study design</b>                | <b>Population age<br/>groups</b> | <b>Classification</b>                              | <b>Included<br/>in meta-<br/>analysis</b> |
|---------------|---------------------------------------------------|----------------------------------------------------------------------------|------------------------------------|----------------------------------|----------------------------------------------------|-------------------------------------------|
| 1             | Butthep et al.(2012) <sup>1</sup>                 | Thailand                                                                   | prospective cohort                 | N/A                              | 1997 WHO Classification                            | No                                        |
| 2             | Hernandez et al.(2014) <sup>2</sup>               | Mexico                                                                     | case-control                       | Adults                           | 1997 WHO Classification                            | Yes                                       |
| 3             | Butthep et al.(2006) <sup>3</sup>                 | Thailand                                                                   | prospective cohort                 | Children                         | 1997 WHO Classification                            | No                                        |
| 4             | Conroy et al.(2015) <sup>4</sup>                  | Columbia                                                                   | nested case control or case-cohort | Mixed population                 | 1997 WHO Classification                            | Yes                                       |
| 5             | Wang et al.(2003) <sup>5</sup>                    | Taiwan                                                                     | nested case control or case-cohort | DENV-3 infection                 | 1997 WHO Classification                            | Yes                                       |
| 6             | Voraphani et al.(2010) <sup>6</sup>               | Thailand                                                                   | prospective cohort                 | Children                         | 1997 WHO Classification                            | Yes                                       |
| 7             | Alexander et al.(2011) <sup>7</sup>               | Thailand, Philippines, Vietnam, Malaysia, Nicaragua, Venezuela, and Brazil | prospective cohort                 | Mixed population                 | Intervention criteria                              | Yes                                       |
| 8             | Yung et al.(2015) <sup>8</sup>                    | Singapore                                                                  | prospective cohort                 | Adults                           | Both 1997 and 2009 WHO Classifications             | Yes                                       |
| 9             | Bongsebandhu et al.(2008) <sup>9</sup>            | Thailand                                                                   | prospective cohort                 | Children                         | 1997 WHO Classification                            | Yes                                       |
| 10            | Yong et al.(2017) <sup>10</sup>                   | Malaysia                                                                   | nested case control or case-cohort | Adults                           | 2009 WHO Classification                            | Yes                                       |
| 11            | Vicente et al.(2017) <sup>11</sup>                | Brazil                                                                     | nested case control or case-cohort | Mixed population                 | The classification of Brazilian Ministry of Health | Yes                                       |
| 12            | Vejchapipat et al.(2006) <sup>12</sup>            | Thailand                                                                   | prospective cohort                 | N/A                              | 1997 WHO Classification                            | Yes                                       |
| 13            | Vasanwala et al.(2014) <sup>13</sup>              | Singapore                                                                  | prospective cohort                 | Adults                           | 1997 WHO Classification                            | Yes                                       |
| 14            | Teixeira et al.(2015) <sup>14</sup>               | Brazil                                                                     | case-control                       | Mixed population                 | 1997 WHO Classification                            | Yes                                       |
| 15            | Tricou et al.(2011) <sup>15</sup>                 | Vietnam                                                                    | retrospective cohort               | Adults                           | 1997 WHO Classification                            | Yes                                       |
| 16            | Trairatvorakul et al.(2005) <sup>16</sup>         | Thailand                                                                   | case-control                       | Children                         | 1997 WHO Classification                            | Yes                                       |
| 17            | Rocha et al.(2017) <sup>17</sup>                  | Brazil                                                                     | prospective cohort                 | Mixed population                 | 2009 WHO Classification                            | Yes                                       |
| 18            | Tang et al.(2017) <sup>18</sup>                   | Singapore                                                                  | nested case control or case-cohort | Adults                           | 1997 WHO Classification                            | Yes                                       |
| 19            | Sreenivasan et al.(2018) <sup>19</sup>            | India                                                                      | prospective cohort                 | Children                         | 2009 WHO Classification                            | Yes                                       |

|    |                                       |             |                                    |                                                                                            |                                        |     |
|----|---------------------------------------|-------------|------------------------------------|--------------------------------------------------------------------------------------------|----------------------------------------|-----|
| 20 | Sosothikul et al.(2007) <sup>20</sup> | Thailand    | prospective cohort                 | Children                                                                                   | 1997 WHO Classification                | Yes |
| 21 | Sirikutt et al.(2014) <sup>21</sup>   | Thailand    | retrospective cohort               | Children                                                                                   | 1997 WHO Classification                | Yes |
| 22 | Restrepo et al.(2008) <sup>22</sup>   | Columbia    | case-control                       | Infants                                                                                    | N/A                                    | Yes |
| 23 | Zain et al.(2016) <sup>23</sup>       | Indonesia   | case-control                       | Adults                                                                                     | 2009 WHO Classification                | No  |
| 24 | Oliveira et al.(2017) <sup>24</sup>   | Brazil      | nested case control or case-cohort | N/A                                                                                        | 1997 WHO Classification                | Yes |
| 25 | Pang et al.(2015) <sup>25</sup>       | Singapore   | case-control                       | Matching with age, gender, laboratory, year of diagnosis, type of care at provisional site | Both 1997 and 2009 WHO Classifications | Yes |
| 26 | Sani et al.(2017) <sup>26</sup>       | Malaysia    | retrospective cohort               | Adults                                                                                     | 2009 WHO Classification                | Yes |
| 27 | Pandey et al.(2015) <sup>27</sup>     | India       | case-control                       | Mixed population                                                                           | 2009 WHO Classification                | Yes |
| 28 | Tuan et al.(2017) <sup>28</sup>       | Vietnam     | prospective cohort                 | Children                                                                                   | 2009 WHO Classification                | Yes |
| 29 | Maron et al.(2010) <sup>29</sup>      | El Savador  | case-control                       | Children                                                                                   | 1997 WHO Classification                | Yes |
| 30 | Mohammed et al.(2010) <sup>30</sup>   | Puerto Rico | case-control                       | Mixed population                                                                           | 1997 WHO Classification                | Yes |
| 31 | Mallhi et al.(2015) <sup>31</sup>     | Malaysia    | retrospective cohort               | Adults                                                                                     | 1997 WHO Classification                | Yes |
| 32 | Lee et al.(2015) <sup>32</sup>        | Taiwan      | retrospective cohort               | Adults                                                                                     | 2009 WHO Classification                | Yes |
| 33 | Lam et al.(2017) <sup>33</sup>        | Vietnam     | prospective cohort                 | Children                                                                                   | 1997 WHO Classification                | Yes |
| 34 | Mohamed et al.(2013) <sup>34</sup>    | Yemen       | retrospective cohort               | Mixed population                                                                           | 1997 WHO Classification                | Yes |
| 35 | Oishi et al.(2006) <sup>35</sup>      | Philippines | prospective cohort                 | Children                                                                                   | 1997 WHO Classification                | Yes |
| 36 | Zhang et al.(2017) <sup>36</sup>      | China       | retrospective cohort               | Adults                                                                                     | 2009 WHO Classification                | No  |
| 37 | Wong et al.(2014) <sup>37</sup>       | Singapore   | prospective cohort                 | Adults                                                                                     | 1997 WHO Classification                | Yes |
| 38 | Wichmann et al.(2004) <sup>38</sup>   | Thailand    | retrospective cohort               | Mixed population                                                                           | 1997 WHO Classification                | Yes |
| 39 | Sharmin et al.(2013) <sup>39</sup>    | Bangladesh  | nested case control or case-cohort | Mixed population                                                                           | 1997 WHO Classification                | No  |
| 40 | Kurane et al.(1991) <sup>40</sup>     | Thailand    | case-control                       | Children                                                                                   | 1997 WHO Classification                | Yes |
| 41 | Kurane et al.(1993) <sup>41</sup>     | Thailand    | case-control                       | Children                                                                                   | 1997 WHO Classification                | Yes |
| 42 | Kuo et al.(2017) <sup>42</sup>        | Taiwan      | retrospective cohort               | Adults                                                                                     | 2009 WHO Classification                | Yes |
| 43 | Kumar et al.(2012) <sup>43</sup>      | Singapore   | nested case control or case-cohort | Adults                                                                                     | 1997 WHO Classification                | Yes |

|    |                                         |                       |                                    |                            |                                        |     |
|----|-----------------------------------------|-----------------------|------------------------------------|----------------------------|----------------------------------------|-----|
| 44 | Kulasinghe et al.(2016) <sup>44</sup>   | Sri Lanka             | prospective cohort                 | Children                   | 1997 WHO Classification                | Yes |
| 45 | Koraka et al.(2004) <sup>45</sup>       | Indonesia             | nested case control or case-cohort | Children                   | 1997 WHO Classification                | Yes |
| 46 | Malavige et al.(2013) <sup>46</sup>     | Sri Lanka             | prospective cohort                 | Adults                     | 2009 WHO Classification                | Yes |
| 47 | Romero et al.(2013) <sup>47</sup>       | Brazil                | cross-sectional study              | Female aged 15 to 49 years | 1997 WHO Classification                | Yes |
| 48 | Libraty et al.(2002) <sup>48</sup>      | Thailand              | nested case control or case-cohort | DENV-2 infection           | 1997 WHO Classification                | Yes |
| 49 | Liao et al.(2015) <sup>49</sup>         | China                 | nested case control or case-cohort | Adults                     | 2009 WHO Classification                | Yes |
| 50 | Lee et al.(2008) <sup>50</sup>          | Singapore             | retrospective cohort               | Adults                     | 1997 WHO Classification                | Yes |
| 51 | Lee et al.(2006) <sup>51</sup>          | Taiwan                | retrospective cohort               | Mixed population           | 1997 WHO Classification                | Yes |
| 52 | Kalayanarooj et al.(1997) <sup>52</sup> | Thailand              | prospective cohort                 | Children                   | 1997 WHO Classification                | No  |
| 53 | Kalayanarooj et al.(2005) <sup>53</sup> | Thailand              | cross-sectional study              | Children                   | 1997 WHO Classification                | No  |
| 54 | Hoang et al.(2010) <sup>54</sup>        | Vietnam               | nested case control or case-cohort | Mixed population           | 1997 WHO Classification                | No  |
| 55 | Harris et al.(2000) <sup>55</sup>       | Nicaragua             | cross-sectional study              | Mixed population           | 1997 WHO Classification                | Yes |
| 56 | Hammond et al.(2005) <sup>56</sup>      | Nicaragua             | prospective cohort                 | Mixed population           | 1997 WHO Classification                | No  |
| 57 | Libraty et al.(2002) <sup>57</sup>      | Thailand              | nested case control or case-cohort | DENV-3 infection           | 1997 WHO Classification                | Yes |
| 58 | Ha et al.(2011) <sup>58</sup>           | Vietnam               | case-control                       | Children                   | 1997 WHO Classification                | No  |
| 59 | Green et al.(1999) <sup>59</sup>        | Thailand              | case-control                       | Children                   | 1997 WHO Classification                | No  |
| 60 | Fried et al.(2010) <sup>60</sup>        | Thailand              | prospective cohort                 | Children                   | 1997 WHO Classification                | Yes |
| 61 | Fragound et al.(2015) <sup>61</sup>     | Cambodia and Columbia | nested case control or case-cohort | Mixed population           | 1997 WHO Classification                | Yes |
| 62 | Flamand et al.(2017) <sup>62</sup>      | French Guiana         | cross-sectional study              | Mixed population           | 2009 WHO Classification                | Yes |
| 63 | Chen et al.(2015) <sup>63</sup>         | Taiwan                | retrospective cohort               | Mixed population           | 2009 WHO Classification                | Yes |
| 64 | Colbert et al.(2007) <sup>64</sup>      | Nicaragua             | prospective cohort                 | Children                   | 1997 WHO Classification                | Yes |
| 65 | Cui et al.(2016) <sup>65</sup>          | Singapore             | nested case control or case-cohort | Adults                     | 1997 WHO Classification                | Yes |
| 66 | Bur et al.(2016) <sup>66</sup>          | Indonesia             | prospective cohort                 | Adults                     | Both 1997 and 2009 WHO Classifications | Yes |
| 67 | Chaiyaratana et al.(2008) <sup>67</sup> | Thailand              | prospective cohort                 | Children                   | 1997 WHO Classification                | No  |

|    |                                           |                  |                                    |                  |                                        |     |
|----|-------------------------------------------|------------------|------------------------------------|------------------|----------------------------------------|-----|
| 68 | Andries et al.(2016) <sup>68</sup>        | Cambodia         | nested case control or case-cohort | Children         | 2009 WHO Classification                | Yes |
| 69 | Murgue et al.(2001) <sup>69</sup>         | French Polynesia | nested case control or case-cohort | Children         | 1997 WHO Classification                | Yes |
| 70 | Biswas et al.(2015) <sup>70</sup>         | Nicaragua        | prospective cohort                 | Children         | Both 1997 and 2009 WHO Classifications | Yes |
| 71 | Carier et al.(2006) <sup>71</sup>         | Venezuela        | prospective cohort                 | N/A              | 1997 WHO Classification                | No  |
| 72 | Lee et al.(2012) <sup>72</sup>            | Singapore        | retrospective cohort               | Mixed population | Both 1997 and 2009 WHO Classifications | No  |
| 73 | Alagarasu et al.(2012) <sup>73</sup>      | India            | nested case control or case-cohort | Mixed population | Both 1997 and 2009 WHO Classifications | Yes |
| 74 | Rathakrishnan et al.(2014) <sup>74</sup>  | Malasia          | prospective cohort                 | Adults           | 2009 WHO Classification                | Yes |
| 75 | Aung et al.(2013) <sup>75</sup>           | Thailand         | retrospective cohort               | Adults           | 2009 WHO Classification                | Yes |
| 76 | Bandyopadhyay et al.(2016) <sup>76</sup>  | India            | retrospective cohort               | Adults           | 1997 WHO Classification                | No  |
| 77 | Bozza et al.(2008) <sup>77</sup>          | Brazil           | prospective cohort                 | Adults           | Both 1997 and 2009 WHO Classifications | Yes |
| 78 | Brasier et al.(2012) <sup>78</sup>        | Venezuela        | prospective cohort                 | Mixed population | 1997 WHO Classification                | Yes |
| 79 | Carrasco et al.(2014) <sup>79</sup>       | Singapore        | retrospective cohort               | Mixed population | 2009 WHO Classification                | No  |
| 80 | Endy et al.(2004) <sup>80</sup>           | Thailand         | prospective cohort                 | Children         | 1997 WHO Classification                | Yes |
| 81 | Fadilah et al.(1999) <sup>81</sup>        | Malaysia         | prospective cohort                 | Adults           | 1997 WHO Classification                | Yes |
| 82 | Flores-Mendoza et al.(2017) <sup>82</sup> | Mexico           | prospective cohort                 | Adults           | 1997 WHO Classification                | Yes |
| 83 | Fox et al.(2011) <sup>83</sup>            | Vietnam          | prospective cohort                 | Mixed population | 1997 WHO Classification                | Yes |
| 84 | Furuta et al.(2012) <sup>84</sup>         | Vietnam          | case-control                       | Children         | 1997 WHO Classification                | Yes |
| 85 | Gopal et al.(2017) <sup>85</sup>          | India            | case-control                       | Adults           | 2009 WHO Classification                | Yes |
| 86 | Green et al.(1999) <sup>86</sup>          | Thailand         | nested case control or case-cohort | Children         | 1997 WHO Classification                | Yes |
| 87 | Guerrero et al.(2013) <sup>87</sup>       | Colombia         | case-control                       | Adults           | 2009 WHO Classification                | Yes |
| 88 | Hoffmeister et al.(2014) <sup>88</sup>    | Germany          | retrospective cohort               | Adults           | 2009 WHO Classification                | Yes |
| 89 | Juffrie et al.(2001) <sup>89</sup>        | Indonesia        | case-control                       | Children         | 1997 WHO Classification                | No  |
| 90 | Khan et al.(2010) <sup>90</sup>           | Pakistan         | cross-sectional study              | Mixed population | 1997 WHO Classification                | No  |
| 91 | Khan et al.(2007) <sup>91</sup>           | Pakistan         | cross-sectional study              | Mixed population | 1997 WHO Classification                | Yes |

|            |                                            |           |                                    |                  |                                        |     |
|------------|--------------------------------------------|-----------|------------------------------------|------------------|----------------------------------------|-----|
| <b>92</b>  | Khan et al.(2013) <sup>92</sup>            | Pakistan  | prospective cohort                 | Mixed population | 1997 WHO Classification                | Yes |
| <b>93</b>  | Kuo et al.(2008) <sup>93</sup>             | Taiwan    | retrospective cohort               | Adults           | 1997 WHO Classification                | Yes |
| <b>94</b>  | Koraka et al.(2001) <sup>94</sup>          | Indonesia | nested case control or case-cohort | Children         | 1997 WHO Classification                | Yes |
| <b>95</b>  | Lee et al.(2009) <sup>95</sup>             | Singapore | retrospective cohort               | Adults           | 1997 WHO Classification                | Yes |
| <b>96</b>  | Lye et al.(2009) <sup>96</sup>             | Singapore | retrospective cohort               | Adults           | 1997 WHO Classification                | Yes |
| <b>97</b>  | Mairuhu et al.(2005) <sup>97</sup>         | Indonesia | prospective cohort                 | Children         | 1997 WHO Classification                | Yes |
| <b>98</b>  | Giraldo et al.(2011) <sup>98</sup>         | Brazil    | retrospective cohort               | Children         | Both 1997 and 2009 WHO Classifications | Yes |
| <b>99</b>  | Singla et al.(2016) <sup>99</sup>          | India     | prospective cohort                 | Children         | 2009 WHO Classification                | Yes |
| <b>100</b> | Vuong et al.(2016) <sup>100</sup>          | Vietnam   | prospective cohort                 | Mixed population | 2009 WHO Classification                | Yes |
| <b>101</b> | Pereira et al.(2018) <sup>101</sup>        | India     | cross-sectional study              | Adults           | 2009 WHO Classification                | Yes |
| <b>102</b> | Phakhounthong et al.(2018) <sup>102</sup>  | Cambodia  | retrospective cohort               | Children         | 2009 WHO Classification                | Yes |
| <b>103</b> | Mondragon et al.(2017) <sup>103</sup>      | Mexico    | nested case control or case-cohort | Adults           | 1997 WHO Classification                | Yes |
| <b>104</b> | Pothapregada et al.(2015) <sup>104</sup>   | India     | cross-sectional study              | Children         | 1997 WHO Classification                | Yes |
| <b>105</b> | Potts et al.(2010) <sup>105</sup>          | Thailand  | retrospective cohort               | Children         | 1997 WHO Classification                | Yes |
| <b>106</b> | Raza et al.(2014) <sup>106</sup>           | Pakistan  | cross-sectional study              | Mixed population | 1997 WHO Classification                | Yes |
| <b>107</b> | Sirivichayakul et al.(2012) <sup>107</sup> | Thailand  | prospective cohort                 | Children         | 1997 WHO Classification                | Yes |
| <b>108</b> | Sharmar et al.(2015) <sup>108</sup>        | India     | prospective cohort                 | Adults           | 1997 WHO Classification                | Yes |
| <b>109</b> | Thein et al.(2015) <sup>109</sup>          | Singapore | prospective cohort                 | Adults           | 1997 WHO Classification                | Yes |
| <b>110</b> | Tissara et al.(2017) <sup>110</sup>        | Sri Lanka | nested case control or case-cohort | Children         | 1997 WHO Classification                | Yes |
| <b>111</b> | Thanachartwet et al.(2016) <sup>111</sup>  | Thailand  | prospective cohort                 | Adults           | 2009 WHO Classification                | Yes |
| <b>112</b> | Thanachartwet et al.(2015) <sup>112</sup>  | Thailand  | prospective cohort                 | Adults           | 2009 WHO Classification                | Yes |
| <b>113</b> | Thanachartwet et al.(2016) <sup>113</sup>  | Thailand  | prospective cohort                 | Adults           | 2009 WHO Classification                | Yes |
| <b>114</b> | Thanachartwet et al.(2016) <sup>114</sup>  | Thailand  | prospective cohort                 | Adults           | 2009 WHO Classification                | Yes |
| <b>115</b> | Vasanwala et al.(2011) <sup>115</sup>      | Singapore | prospective cohort                 | Mixed population | 1997 WHO Classification                | Yes |
| <b>116</b> | Villar-Centeno et al.(2008) <sup>116</sup> | Colombia  | prospective cohort                 | Mixed population | 1997 WHO Classification                | Yes |

|     |                                                            |               |                       |                  |                         |     |
|-----|------------------------------------------------------------|---------------|-----------------------|------------------|-------------------------|-----|
| 117 | Garcia-Rivera et al.(2003) <sup>117</sup>                  | Puerto Rico   | cross-sectional study | Mixed population | 1997 WHO Classification | Yes |
| 118 | Prasad, D.; Bhriuvanshi, A. et al. (2020) <sup>118</sup>   | India         | cohort                | children         | 2009 WHO Classification | Yes |
| 119 | Chandrashekhar et al. (2019) <sup>119</sup>                | India         | cohort                | children         | 2009 WHO Classification | No  |
| 120 | Elenga et al. (2019) <sup>120</sup>                        | French Guiana | cohort                | children         | 2009 WHO Classification | No  |
| 121 | Goncalves, B. S. et al. (2019) <sup>121</sup>              | Brazil        | cohort                | mixed population | 2009 WHO Classification | Yes |
| 122 | Goncalves, B. S. et al. (2) et al. (2019) <sup>122</sup>   | Brazil        | cohort                | mixed population | 2009 WHO Classification | Yes |
| 123 | Phuong, N. T. N. et al. (2019) <sup>123</sup>              | Vietnam       | cohort                | children         | 2009 WHO Classification | Yes |
| 124 | Ta, T. V. at al. et al. (2019) <sup>124</sup>              | Vietnam       | cohort                | children         | 1997 WHO Classification | Yes |
| 125 | May, W. L. et al. et al. (2019) <sup>125</sup>             | Myanma        | cross-sectional study | children         | 2009 WHO Classification | Yes |
| 126 | Nguyen Phung <sup>126</sup> , N. T. et al. (2019)          | Vietnam       | cross-sectional study | children         | 2009 WHO Classification | No  |
| 127 | Patra, Goutam et al. (2019) <sup>127</sup>                 | India         | cohort                | mixed population | 2009 WHO Classification | Yes |
| 128 | Wang, W. H. et al. (2019) <sup>128</sup>                   | Taiwan        | cohort                | mixed population | 1997 WHO Classification | Yes |
| 129 | Opasawatchai, A et al. (2019) <sup>129</sup>               | Thailand      | cohort                | others           | 1997 WHO Classification | No  |
| 130 | Kularatnam, G. A. M. et al (2019) <sup>130</sup>           | Sri Lanka     | cohort                | children         | 1997 WHO Classification | Yes |
| 131 | Agrawal, V. K. et al. et al. (2018) <sup>131</sup>         | India         | cohort                | mixed population | 2009 WHO Classification | Yes |
| 132 | Athira, P. P. et al. (2018) <sup>132</sup>                 | India         | cross-sectional study | children         | 2009 WHO Classification | No  |
| 133 | Boillat-Blanco, N. et al. (2018) <sup>133</sup>            | Tanzania      | cohort                | others           | 2009 WHO Classification | Yes |
| 134 | Lee, I. K. et al. (2018) <sup>134</sup>                    | Taiwan        | cross-sectional study | others           | 2009 WHO Classification | Yes |
| 135 | Low, G. K. K. et al. (2018) <sup>135</sup>                 | Malaysia      | cohort                | others           | 2009 WHO Classification | Yes |
| 136 | Saniathi, N. K. E et al. (2018) <sup>136</sup>             | Indonesia     | case-control          | children         | 1997 WHO Classification | Yes |
| 137 | Srivastava, G.; Chhavi, N.; Goel, A. (2018) <sup>137</sup> | India         | cohort                | children         | 2009 WHO Classification | Yes |
| 138 | Temprasertudee, S. et al. (2018) <sup>138</sup>            | Thailand      | cohort                | others           | 2009 WHO Classification | Yes |
| 139 | Villamor, E. et al. (2018) <sup>139</sup>                  | Colombia      | case-control          | mixed population | 1997 WHO Classification | Yes |
| 140 | Wakimoto, M. D. et al. (2018) <sup>140</sup>               | Brazil        | case-control          | children         | 2009 WHO Classification | Yes |
| 141 | Masood, Kiran Iqbal et al. (2018) <sup>141</sup>           | Pakistan      | case-control          | mixed population | 2009 WHO Classification | Yes |
| 142 | Wijeratne, D. T. et al. (2018) <sup>142</sup>              | Colombia      | cohort                | others           | 1997 WHO Classification | Yes |

|     |                                                             |              |                       |                  |                         |     |
|-----|-------------------------------------------------------------|--------------|-----------------------|------------------|-------------------------|-----|
| 143 | Zhang, H. et al. (2018) <sup>143</sup>                      | China        | cohort                | others           | 2009 WHO Classification | Yes |
| 144 | Ralapanawa, U. et al. (2018) <sup>144</sup>                 | Sri Lanka    | cross-sectional study | others           | 1997 WHO Classification | Yes |
| 145 | Mapalagamage, M. et al. (2018) <sup>145</sup>               | Sri Lanka    | cohort                | others           | 1997 WHO Classification | Yes |
| 146 | Hegazi, M. A. et al. (2020) <sup>146</sup>                  | Saudi Arabia | cohort                | mixed population | 2009 WHO Classification | Yes |
| 147 | Mapalagamage, M. et al. (2019) <sup>147</sup>               | Sri Lanka    | case-control          | mixed population | 2009 WHO Classification | No  |
| 148 | Patra, G.; Saha, B.; Mukhopadhyay, S. (2019) <sup>148</sup> | India        | cohort                | mixed population | 2009 WHO Classification | Yes |
| 149 | Sani, H. et al et al. (2019) <sup>149</sup>                 | Malaysia     | cross-sectional study | others           | 2009 WHO Classification | Yes |
| 150 | Mahmud, Muhammad Rizwan et al. (2018) <sup>150</sup>        | Pakistan     | cohort                | mixed population | 1997 WHO Classification | Yes |

23

## 24 References

- 25 1. Butthep P, Chunchakan S, Yoksan S, Tangnararatchakit K, Chuansumrit A. Alteration of cytokines and chemokines during febrile episodes  
26 associated with endothelial cell damage and plasma leakage in dengue hemorrhagic fever. *Pediatric Infectious Disease Journal*.  
27 2012;31(12):e232-e8.
- 28 2. del Moral-Hernandez O, Martinez-Hernandez NE, Mosso-Pani MA, Hernandez-Sotelo D, Illades-Aguiar B, Flores-Alfaro E, et al.  
29 Association DENV1 and DENV2 infection with high serum levels of soluble thrombomodulin and VEGF in patients with dengue fever and dengue  
30 hemorrhagic fever. *International Journal of Clinical and Experimental Medicine*. 2014;7(2):370-8.
- 31 3. Butthep P, Chunchakan S, Tangnararatchakit K, Yoksan S, Pattanapanyasat K, Chuansumrit A. Elevated soluble thrombomodulin in the  
32 febrile stage related to patients at risk for dengue shock syndrome. *Pediatric Infectious Disease Journal*. 2006;25(10):894-7.

- 33 4. Conroy AL, Gelvez M, Hawkes M, Rajwans N, Tran V, Liles WC, et al. Host biomarkers are associated with progression to dengue  
34 haemorrhagic fever: A nested case-control study. *International Journal of Infectious Diseases*. 2015;40:45-53.
- 35 5. Wang WK, Chao DY, Kao CL, Wu HC, Liu YC, Li CM, et al. High levels of plasma dengue viral load during defervescence in patients with  
36 dengue hemorrhagic fever: Implications for pathogenesis. *Virology*. 2003;305(2):330-8.
- 37 6. Voraphani N, Theamboonlers A, Khongphatthanayothin A, Srisai C, Poovorawan Y. Increased level of hepatocyte growth factor in children  
38 with dengue virus infection. *Annals of Tropical Paediatrics*. 2010;30(3):213-8.
- 39 7. Alexander N, Balmaseda A, Coelho ICB, Dimaano E, Hien TT, Hung NT, et al. Multicentre prospective study on dengue classification in  
40 four South-east Asian and three Latin American countries. *Tropical Medicine and International Health*. 2011;16(8):936-48.
- 41 8. Yung CF, Lee KS, Thein TL, Tan LK, Gan VC, Wong JG, et al. Dengue serotype-specific differences in clinical manifestation, hematological  
42 parameters, plasma viral concentration and risk of severe disease in adults. *American Journal of Tropical Medicine and Hygiene*. 2013;1):35.
- 43 9. Bongsebandhu-Phubhakdi C, Hemungkorn M, Thisyakorn U, Thisyakorn C. Risk factors influencing severity in pediatric Dengue infection.  
44 *Asian Biomedicine*. 2008;2(5):409-13.
- 45 10. Yong YK, Tan HY, Jen SH, Shankar EM, Natkunam SK, Sathar J, et al. Aberrant monocyte responses predict and characterize dengue  
46 virus infection in individuals with severe disease. *Journal of Translational Medicine*. 2017;15 (1) (no pagination)(121).
- 47 11. Vicente CR, Cerutti Junior C, Froschl G, Romano CM, Cabidelle AS, Herbinger KH. Influence of demographics on clinical outcome of  
48 dengue: a cross-sectional study of 6703 confirmed cases in Vitoria, Espirito Santo State, Brazil. *Epidemiol Infect*. 2017;145(1):46-53.



- 49 12. Vejchapipat P, Theamboonlers A, Chongsrisawat V, Poovorawan Y. An evidence of intestinal mucosal injury in dengue infection.  
50 Southeast Asian Journal of Tropical Medicine and Public Health. 2006;37(1):79-82.
- 51 13. Vasanwala FF, Thein T, Leo Y, Gan VC, Hao Y, Lee LK, et al. Predictive value of proteinuria in adult dengue severity. PLoS Neglected  
52 Tropical Diseases. 2014;8(2).
- 53 14. Teixeira MG, Paixao ES, Costa MCN, Cunha RV, Pamplona L, Dias JP, et al. Arterial Hypertension and Skin Allergy Are Risk Factors for  
54 Progression from Dengue to Dengue Hemorrhagic Fever: A Case Control Study. PLoS Neglected Tropical Diseases. 2015;9 (5) (no  
55 pagination)(e0003812).
- 56 15. Tricou V, Nguyet Nguyen M, Farrar J, Hien Tinh T, Simmons CP. Kinetics of viremia and NS1 antigenemia are shaped by immune status  
57 and virus serotype in adults with dengue. PLoS Neglected Tropical Diseases. 2011;5(9).
- 58 16. Trairatvorakul P, Chongsrisawat V, Ngamvasinont D, Asawarachun D, Nantasook J, Poovorawan Y. Serum nitric oxide in children with  
59 dengue infection. Asian Pacific Journal of Allergy and Immunology. 2005;23(2-3):115-9.
- 60 17. Rocha BAM, Guilarde AO, Argolo AFLT, Tassara MP, da Silveira LA, Junqueira IC, et al. Dengue-specific serotype related to clinical  
61 severity during the 2012/2013 epidemic in centre of Brazil. Infectious Diseases of Poverty. 2017;6 (1) (no pagination)(116).
- 62 18. Tang TH, Alonso S, Ng LF, Thein TL, Pang VJ, Leo YS, et al. Increased Serum Hyaluronic Acid and Heparan Sulfate in Dengue Fever:  
63 Association with Plasma Leakage and Disease Severity. Scientific Reports. 2017;7:46191.

- 64 19. Sreenivasan P, S G, K S. Development of a Prognostic Prediction Model to Determine Severe Dengue in Children. Indian Journal of  
65 Pediatrics. 2018:1-7.
- 66 20. Soothikul D, Seksarn P, Pongsewalak S, Thisyakorn U, Lusher J. Activation of endothelial cells, coagulation and fibrinolysis in children  
67 with Dengue virus infection. Thrombosis and Haemostasis. 2007;97(4):627-34.
- 68 21. Sirikutt P, Kalayanarooj S. Serum lactate and lactate dehydrogenase as parameters for the prediction of dengue severity. Journal of the  
69 Medical Association of Thailand. 2014;97(Supplement 6):S220-S31.
- 70 22. Restrepo BN, Isaza DM, Salazar CL, Ramirez R, Ospina M, Alvarez LG. Serum levels of interleukin-6, tumor necrosis factor-alpha and  
71 interferon-gamma in infants with and without dengue. Revista Da Sociedade Brasileira de Medicina Tropical. 2008;41(1):6-10.
- 72 23. Nurfadly Z, Suhartono TP, Umar Z, Herman H. Soluble Fas ligand as a potential marker of severity of dengue infection. Malaysian Journal  
73 of Medical Sciences. 2017;24(2):28-32.
- 74 24. Oliveira RADS, Cordeiro MT, Moura PMMFD, Baptista Filho PNB, Braga-Neto UDM, Marques ETDA, et al. Serum cytokine/chemokine  
75 profiles in patients with dengue fever (DF) and dengue hemorrhagic fever (FHD) by using protein array. Journal of Clinical Virology. 2017;89:39-  
76 45.
- 77 25. Pang JX, Thein TL, Lye DC, Leo YS. Differential Clinical Outcome of Dengue Infection among Patients with and without HIV Infection: A  
78 Matched Case Control Study. American Journal of Tropical Medicine and Hygiene. 2015;92(6):1156-62.

- 79 26. Md Sani SS, Han WH, Bujang MA, Ding HJ, Ng KL, Amir Shariffuddin MA. Evaluation of creatine kinase and liver enzymes in identification  
80 of severe dengue. *BMC Infectious Diseases*. 2017;17 (1) (no pagination)(505).
- 81 27. Pandey N, Jain A, Garg RK, Kumar R, Agrawal OP, Lakshmana Rao PV. Serum levels of IL-8, IFN $\gamma$ , IL-10, and TGF beta and their  
82 gene expression levels in severe and non-severe cases of dengue virus infection. *Archives of virology*. 2015;160(6):1463-75.
- 83 28. Nguyen MT, Ho TN, Nguyen VV, Nguyen TH, Ha MT, Ta VT, et al. An Evidence-Based Algorithm for Early Prognosis of Severe Dengue  
84 in the Outpatient Setting. *Clinical Infectious Diseases*. 2017;64(5):656-63.
- 85 29. Maron GM, Clara AW, Diddle JW, Pleites EB, Miller L, MacDonald G, et al. Association between nutritional status and severity of dengue  
86 infection in children in el salvador. *American Journal of Tropical Medicine and Hygiene*. 2010;82(2):324-9.
- 87 30. Mohammed H, Ramos M, Armstrong J, Munoz-Jordan J, Arnold-Lewis KO, Ayala A, et al. An outbreak of dengue fever in St. Croix (US  
88 Virgin Islands), 2005. *PLoS ONE*. 2010;32.
- 89 31. Mallhi TH, Khan AH, Adnan AS, Sarriff A, Khan YH, Jummaat F. Clinico-laboratory spectrum of dengue viral infection and risk factors  
90 associated with dengue hemorrhagic fever: A retrospective study. *BMC Infectious Diseases*. 2015;15 (1) (no pagination)(399).
- 91 32. Lee IK, Liu JW, Chen YH, Chen YC, Tsai CY, Huang SY, et al. Development of a simple clinical risk score for early prediction of severe  
92 dengue in adult patients. *PLoS ONE*. 2016;11 (5) (no pagination)(e0154772).

- 93 33. Lam PK, Ngoc TV, Thu Thuy TT, Hong Van NT, Nhu Thuy TT, Hoai Tam DT, et al. The value of daily platelet counts for predicting dengue  
94 shock syndrome: Results from a prospective observational study of 2301 Vietnamese children with dengue. PLoS Neglected Tropical Diseases.  
95 2017;11 (4) (no pagination)(e0005498).
- 96 34. Mohamed NA, El-Raouf EA, Ibraheem HA. Respiratory manifestations of dengue fever in Taiz-Yemen. Egyptian Journal of Chest Diseases  
97 and Tuberculosis. 2013;62(2):319-23.
- 98 35. Oishi K, Mapua CA, Carlos CC, Cinco-Abanes MTDD, Saito M, Inoue S, et al. Dengue and other febrile illnesses among children in the  
99 Philippines. Dengue Bulletin. 2006;30:26-34.
- 100 36. Zhang H, Xie WZ, Xie SX, Ou YY, Zeng TW, Zhou PY. A novel predictor of patients with severe dengue: The aspartate  
101 aminotransferase/platelet count ratio index (APRI). Hepatology International. 2017;11 (1 Supplement 1):S548-S9.
- 102 37. Wong JG, Gan VC, Ng EL, Leo YS, Lye DC. Self-reported pain intensity using the numeric reporting scale in adult dengue management.  
103 American Journal of Tropical Medicine and Hygiene. 2013;1):180.
- 104 38. Wichmann O, Hongsiriwon S, Bowonwatanuwong C, Chotivanich K, Sukthana Y, Pukrittayakamee S. Risk factors and clinical features  
105 associated with severe dengue infection in adults and children during the 2001 epidemic in Chonburi, Thailand. Tropical Medicine and International  
106 Health. 2004;9(9):1022-9.
- 107 39. Sharmin R, Tabassum S, Mamun KZ, Nessa A, Jahan M. Dengue infection in Dhaka City, Bangladesh. Mymensingh medical journal :  
108 MMJ. 2013;22(4):781-6.

- 109 40. Kurane I, Innis BL, Nimmannitya S, Nisalak A, Meager A, Janus J, et al. Activation of T lymphocytes in dengue virus infections: High levels  
110 of soluble interleukin 2 receptor, soluble CD4, soluble CD8, interleukin 2, and interferon-gamma in sera of children with dengue. *Journal of Clinical*  
111 *Investigation*. 1991;88(5):1473-80.
- 112 41. Kurane I, Innis BL, Nimmannitya S, Nisalak A, Meager A, Ennis FA. High levels of interferon alpha in the sera of children with dengue  
113 virus infection. *American Journal of Tropical Medicine and Hygiene*. 1993;48(2):222-9.
- 114 42. Kuo HJ, Lee IK, Liu JW. Analyses of clinical and laboratory characteristics of dengue adults at their hospital presentations based on the  
115 World Health Organization clinical-phase framework: Emphasizing risk of severe dengue in the elderly. *Journal of Microbiology, Immunology and*  
116 *Infection*. 2017.
- 117 43. Kumar Y, Liang C, Bo Z, Rajapakse JC, Ooi EE, Tannenbaum SR. Serum Proteome and Cytokine Analysis in a Longitudinal Cohort of  
118 Adults with Primary Dengue Infection Reveals Predictive Markers of DHF. *PLoS Neglected Tropical Diseases*. 2012;6 (11) (no pagination)(e1887).
- 119 44. Kulasinghe S, Ediriweera R, Kumara P. Association of abnormal coagulation tests with dengue virus infection and their significance as  
120 early predictors of fluid leakage and bleeding. *Sri Lanka Journal of Child Health*. 2016;45(3):184-8.
- 121 45. Koraka P, Murgue B, Deparis X, Van Gorp ECM, Setiati TE, Osterhaus ADME, et al. Elevation of Soluble VCAM-1 Plasma Levels in  
122 Children with Acute Dengue Virus Infection of Varying Severity. *Journal of Medical Virology*. 2004;72(3):445-50.
- 123 46. Malavige GN, Gomes L, Alles L, Chang T, Salimi M, Fernando S, et al. Serum IL-10 as a marker of severe dengue infection. *BMC Infectious*  
124 *Diseases*. 2013;13 (1) (no pagination)(341).

- 125 47. Machado CR, Machado ES, Denis Rohloff R, Azevedo M, Campos DP, de Oliveira RB, et al. Is Pregnancy Associated with Severe  
126 Dengue? A Review of Data from the Rio de Janeiro Surveillance Information System. PLoS Neglected Tropical Diseases. 2013;7 (5) (no  
127 pagination)(e2217).
- 128 48. Libraty DH, Young PR, Pickering D, Endy TP, Kalayanarooj S, Green S, et al. High circulating levels of the dengue virus nonstructural  
129 protein NS1 early in dengue illness correlate with the development of dengue hemorrhagic fever. Journal of Infectious Diseases.  
130 2002;186(8):1165-8.
- 131 49. Liao B, Tang Y, Hu F, Zhou W, Yao X, Hong W, et al. Serum levels of soluble vascular cell adhesion molecules may correlate with the  
132 severity of dengue virus-1 infection in adults. Emerging microbes & infections. 2015;4(4):e24.
- 133 50. Lee VJ, Lye DCB, Sun Y, Fernandez G, Ong A, Leo YS. Predictive value of simple clinical and laboratory variables for dengue hemorrhagic  
134 fever in adults. Journal of Clinical Virology. 2008;42(1):34-9.
- 135 51. Lee MS, Hwang KP, Chen TC, Lu PL, Chen TP. Clinical characteristics of dengue and dengue hemorrhagic fever in a medical center of  
136 southern Taiwan during the 2002 epidemic. Journal of Microbiology, Immunology and Infection. 2006;39(2):121-9.
- 137 52. Kalayanarooj S, Vaughn DW, Nimmannitya S, Green S, Suntayakorn S, Kunentrasai N, et al. Early clinical and laboratory indicators of  
138 acute dengue illness. Journal of Infectious Diseases. 1997;176(2):313-21.
- 139 53. Kalayanarooj S, Nimmannitya S. Is dengue severity related to nutritional status? Southeast Asian Journal of Tropical Medicine and Public  
140 Health. 2005;36(2):378-84.

- 141 54. Hoang LT, Lynn DJ, Henn M, Birren BW, Lennon NJ, Le PT, et al. The early whole-blood transcriptional signature of dengue virus and  
142 features associated with progression to dengue shock syndrome in Vietnamese children and young adults. *Journal of Virology*.  
143 2010;84(24):12982-94.
- 144 55. Harris E, Videa E, Perez L, Sandoval E, Tellez Y, Perez MD, et al. Clinical, epidemiologic, and virologic features of dengue in the 1998  
145 epidemic in Nicaragua. *American Journal of Tropical Medicine and Hygiene*. 2000;63(1-2):5-11.
- 146 56. Hammond SN, Balmaseda A, Perez L, Tellez Y, Saborio SI, Mercado JC, et al. Differences in dengue severity in infants, children, and  
147 adults in a 3-year hospital-based study in Nicaragua. *American Journal of Tropical Medicine and Hygiene*. 2005;73(6):1063-70.
- 148 57. Libraty DH, Endy TP, Houg HS, Green S, Kalayanarooj S, Suntayakorn S, et al. Differing influences of virus burden and immune activation  
149 on disease severity in secondary dengue-3 virus infections. *Journal of Infectious Diseases*. 2002;185(9):1213-21.
- 150 58. Ha TTN, Huy NT, Murao LA, Lan NTP, Thuy TT, Tuan HM, et al. Elevated levels of cell-free circulating DNA in patients with acute dengue  
151 virus infection. *PLoS ONE*. 2011;6 (10) (no pagination)(e25969).
- 152 59. Green S, Pichyangkul S, Vaughn DW, Kalayanarooj S, Nimmannitya S, Nisalak A, et al. Early CD69 expression on peripheral blood  
153 lymphocytes from children with dengue hemorrhagic fever. *Journal of Infectious Diseases*. 1999;180(5):1429-35.
- 154 60. Fried JR, Gibbons RV, Kalayanarooj S, Thomas SJ, Srikiatkachorn A, Yoon IK, et al. Serotype-specific differences in the risk of dengue  
155 hemorrhagic fever: An analysis of data collected in Bangkok, Thailand from 1994 to 2006. *PLoS Neglected Tropical Diseases*. 2010;4 (3) (no  
156 pagination)(e617).

- 157 61. Fragnoud R, Flamand M, Reynier F, Buchy P, Duong V, Pachot A, et al. Differential proteomic analysis of virus-enriched fractions obtained  
158 from plasma pools of patients with dengue fever or severe dengue. *BMC Infectious Diseases*. 2015;15 (1) (no pagination)(518).
- 159 62. Flamand C, Fritzell C, Prince C, Abboud P, Ardillon V, Carvalho L, et al. Epidemiological assessment of the severity of dengue epidemics  
160 in French Guiana. *Plos One*. 2017;12(2).
- 161 63. Chen C-C, Lee I-K, Liu J-W, Huang S-Y, Wang L. Utility of C-Reactive Protein Levels for Early Prediction of Dengue Severity in Adults.  
162 *BioMed Research International*. 2015;2015:1-6.
- 163 64. Colbert JA, Gordon A, Roxelin R, Silva S, Silva J, Rocha C, et al. Ultrasound measurement of gallbladder wall thickening as a diagnostic  
164 test and prognostic indicator for severe dengue in pediatric patients. *Pediatric Infectious Disease Journal*. 2007;26(9):850-2.
- 165 65. Cui L, Lee YH, Thein TL, Fang J, Pang J, Ooi EE, et al. Serum Metabolomics Reveals Serotonin as a Predictor of Severe Dengue in the  
166 Early Phase of Dengue Fever. *PLoS Neglected Tropical Diseases*. 2016;10 (4) (no pagination)(e0004607).
- 167 66. Bur R, Suwanto S, Santoso WD, Harimurti K. Serum lactate as predictor and diagnostic biomarker of plasma leakage in adult dengue  
168 patients. *Universa Medicina*. 2016;35(3):213-21.
- 169 67. Chaiyaratana W, Chuansumrit A, Atamasirikul K, Tangnararatchakit K. Serum ferritin levels in children with dengue infection. *The  
170 Southeast Asian journal of tropical medicine and public health*. 2008;39(5):832-6.
- 171 68. Andries AC, Duong V, Cappelle J, Ong S, Kerleguer A, Ly S, et al. Proteinuria during dengue fever in children. *International Journal of  
172 Infectious Diseases*. 2017;55:38-44.



- 173 69. Murgue B, Cassar O, Deparis X. Plasma concentrations of sVCAM-1 and severity of dengue infections. *Journal of Medical Virology*.  
174 2001;65(1):97-104.
- 175 70. Biswas H, Gordon A, Elizondo D, Nunez A, Rocha C, Perez MA, et al. Lower cholesterol levels are associated with severe dengue  
176 outcome. *American Journal of Tropical Medicine and Hygiene*. 2014;1):57.
- 177 71. Cardier JE, Balogh V, Perez-Silva C, Romano E, Rivas B, Bosch N, et al. Relationship of thrombopoietin and interleukin-11 levels to  
178 thrombocytopenia associated with dengue disease. *Cytokine*. 2006;34(3-4):155-60.
- 179 72. Lee LK, Gan VC, Lee VJ, Tan AS, Leo YS, Lye DC. Clinical relevance and discriminatory value of elevated liver aminotransferase levels  
180 for dengue severity. *PLoS Negl Trop Dis*. 2012;6(6):e1676.
- 181 73. Alagarasu K, Bachal RV, Bhagat AB, Shah PS, Dayaraj C. Elevated levels of vitamin D and deficiency of mannose binding lectin in dengue  
182 hemorrhagic fever. *Virology Journal*. 2012;9.
- 183 74. Rathakrishnan A, Klekamp B, Wang SM, Komarasamy TV, Natkunam SK, Sathar J, et al. Clinical and immunological markers of dengue  
184 progression in a study cohort from a hyperendemic area in Malaysia. *PLoS ONE*. 2014;9 (3) (no pagination)(e92021).
- 185 75. Aung KL, Thanachartwet V, Desakorn V, Chamnanchanunt S, Sahassananda D, Chierakul W, et al. Factors associated with severe clinical  
186 manifestation of dengue among adults in Thailand. *The Southeast Asian journal of tropical medicine and public health*. 2013;44(4):602-12.
- 187 76. Bandyopadhyay D, Chattaraj S, Hajra A, Mukhopadhyay S, Ganesan V. A study on spectrum of hepatobiliary dysfunctions and pattern of  
188 liver involvement in dengue infection. *Journal of Clinical and Diagnostic Research*. 2016;10(5):OC21-OC6.

- 189 77. Bozza FA, Cruz OG, Zagne SMO, Azeredo EL, Nogueira RMR, Assis EF, et al. Multiplex cytokine profile from dengue patients: MIP-1beta  
190 and IFN-gamma as predictive factors for severity. BMC Infectious Diseases. 2008;8 (no pagination)(86).
- 191 78. Brasier AR, Ju H, Garcia J, Spratt HM, Victor SS, Forshey BM, et al. A three-component biomarker panel for prediction of dengue  
192 hemorrhagic fever. American Journal of Tropical Medicine and Hygiene. 2012;86(2):341-8.
- 193 79. Carrasco LR, Leo YS, Cook AR, Lee VJ, Thein TL, Go CJ, et al. Predictive Tools for Severe Dengue Conforming to World Health  
194 Organization 2009 Criteria. PLoS Neglected Tropical Diseases. 2014;8 (7) (no pagination)(e2972).
- 195 80. Endy TP, Nisalak A, Chunsuttitwat S, Vaughn DW, Green S, Ennis FA, et al. Relationship of preexisting dengue virus (DV) neutralizing  
196 antibody levels to viremia and severity of disease in a prospective cohort study of DV infection in Thailand. Journal of Infectious Diseases.  
197 2004;189(6):990-1000.
- 198 81. Fadilah SA, Sahrir S, Raymond AA, Cheong SK, Aziz JA, Sivagengei K. Quantitation of T lymphocyte subsets helps to distinguish dengue  
199 hemorrhagic fever from classic dengue fever during the acute febrile stage. The Southeast Asian journal of tropical medicine and public health.  
200 1999;30(4):710-7.
- 201 82. Flores-Mendoza LK, Estrada-Jimenez T, Sedeno-Monge V, Moreno M, Manjarrez MDC, Gonzalez-Ochoa G, et al. IL-10 and socs3 Are  
202 Predictive Biomarkers of Dengue Hemorrhagic Fever. Mediators of Inflammation. 2017;2017:5197592.
- 203 83. Fox A, Hoa LNM, Simmons CP, Wolbers M, Wertheim HFL, Khuong PT, et al. Immunological and Viral Determinants of Dengue Severity  
204 in Hospitalized Adults in Ha Noi, Viet Nam. Plos Neglected Tropical Diseases. 2011;5(3).

- 205 84. Furuta T, Murao LA, Lan NTP, Huy NT, Huong VTQ, Thuy TT, et al. Association of mast cell-derived VEGF and proteases in dengue  
206 shock syndrome. *PLoS Neglected Tropical Diseases*. 2012;6 (2) (no pagination)(e1505).
- 207 85. Gopal SSS, Pillai AB, Ramachandrappaa VS, Kadiravan T, Dhodapkar R, Kah J, et al. Increased serum levels of macrophage activation  
208 marker sCD163 in Dengue patients. *Journal of Clinical Virology*. 2017;86:62-7.
- 209 86. Green S, Vaughn DW, Kalayanarooj S, Nimmannitya S, Suntayakorn S, Nisalak A, et al. Early immune activation in acute dengue illness  
210 is related to development of plasma leakage and disease severity. *Journal of Infectious Diseases*. 1999;179(4):755-62.
- 211 87. Guerrero CD, Arrieta AF, Ramirez ND, Rodriguez LS, Vega R, Bosch I, et al. High plasma levels of soluble ST2 but not its ligand IL-33 is  
212 associated with severe forms of pediatric dengue. *Cytokine*. 2013;61(3):766-71.
- 213 88. Hoffmeister B, Suttorp N, Zoller T. The revised dengue fever classification in German travelers: clinical manifestations and indicators for  
214 severe disease. *Infection*. 2014;25.
- 215 89. Juffrie M, Vo Meer GM, Hack CE, Haasnoot K, Sutaryo, Veerman AJP, et al. Inflammatory mediators in dengue virus infection in children:  
216 Interleukin-6 and its relation to C-reactive protein and secretory phospholipase A2. *American Journal of Tropical Medicine and Hygiene*.  
217 2001;65(1):70-5.
- 218 90. Khan E, Kisat M, Khan N, Nasir A, Ayub S, Hasan R. Demographic and clinical features of dengue fever in Pakistan from 2003-2007: A  
219 retrospective cross- sectional study. *PLoS ONE*. 2010;5(9):1-7.

- 220 91. Khan E, Siddiqui J, Shakoor S, Mehraj V, Jamil B, Hasan R. Dengue outbreak in Karachi, Pakistan, 2006: experience at a tertiary care  
221 center. *Transactions of the Royal Society of Tropical Medicine and Hygiene*. 2007;101(11):1114-9.
- 222 92. Khan MIH, Anwar E, Agha A, Hassanien NSM, Ullah E, Syed IA, et al. Factors predicting severe dengue in patients with dengue fever.  
223 *Mediterranean Journal of Hematology and Infectious Diseases*. 2013;5 (1) (no pagination)(e2013014).
- 224 93. Kuo MC, Lu PL, Chang JM, Lin MY, Tsai JJ, Chen YH, et al. Impact of renal failure on the outcome of dengue viral infection. *Clinical*  
225 *Journal of the American Society of Nephrology*. 2008;3(5):1350-6.
- 226 94. Koraka P, Suharti C, Setiati TE, Mairuhu ATA, Van Gorp E, Hach CE, et al. Kinetics of dengue virus-specific serum immunoglobulin  
227 classes and subclasses correlate with clinical outcome of infection. *Journal of Clinical Microbiology*. 2001;39(12):4332-8.
- 228 95. Lee VJ, Lye DC, Sun Y, Leo YS. Decision tree algorithm in deciding hospitalization for adult patients with dengue haemorrhagic fever in  
229 Singapore. *Tropical Medicine and International Health*. 2009;14(9):1154-9.
- 230 96. Lye DC, Lee VJ, Sun Y, Leo YS. The benign nature of acute dengue infection in hospitalized older adults in Singapore. *International*  
231 *Journal of Infectious Diseases*.
- 232 97. Mairuhu ATA, Peri G, Setiati TE, Hack CE, Koraka P, Soemantri A, et al. Elevated plasma levels of the long pentraxin, pentraxin 3, in  
233 severe dengue virus infections. *Journal of Medical Virology*. 2005;76(4):547-52.
- 234 98. Giraldo D, Sant'Anna C, Perisse AR, March Mde F, Souza AP, Mendes A, et al. Characteristics of children hospitalized with dengue fever  
235 in an outbreak in Rio de Janeiro, Brazil. *Trans R Soc Trop Med Hyg*. 2011;105(10):601-3.

- 236 99. Singla M, Kar M, Sethi T, Kabra SK, Lodha R, Chandele A, et al. Immune Response to Dengue Virus Infection in Pediatric Patients in New  
237 Delhi, India-Association of Viremia, Inflammatory Mediators and Monocytes with Disease Severity. PLoS Neglected Tropical Diseases. 2016;10  
238 (3) (no pagination)(e0004497).
- 239 100. Vuong NL, Manh DH, Mai NT, Phuc LH, Luong VT, Quan VD, et al. Criteria of "persistent vomiting" in the WHO 2009 warning signs for  
240 dengue case classification. Tropical Medicine and Health. 2016;44 (1) (no pagination)(14).
- 241 101. Pereira MS, Kudru CU, Nair S, Thunga G, Kunhikatta V, Guddattu V. Factors associated with severity of illness in patients with dengue  
242 fever in a tertiary care hospital in southern India. Asian Journal of Pharmaceutical and Clinical Research. 2018;11(3):272-6.
- 243 102. Phakhounthong K, Chaovalit P, Jittamala P, Blacksell SD, Carter MJ, Turner P, et al. Predicting the severity of dengue fever in children  
244 on admission based on clinical features and laboratory indicators: Application of classification tree analysis. BMC Pediatrics. 2018;18 (1) (no  
245 pagination)(109).
- 246 103. Posadas-Mondragon A, Aguilar-Faisal JL, Chavez-Negrete A, Guillen-Salomon E, Alcantara-Farfan V, Luna-Rojas L, et al. Indices of anti-  
247 dengue immunoglobulin G subclasses in adult Mexican patients with febrile and hemorrhagic dengue in the acute phase. Microbiology and  
248 Immunology. 2017;61(10):433-41.
- 249 104. Pothapregada S, Kamalakannan B, Thulasingham M. Risk factors for shock in children with dengue fever. Indian Journal of Critical Care  
250 Medicine. 2015;19(11):661-4.
- 251 105. Potts JA, Thomas SJ, Srikiatkachorn A, Supradish PO, Li W, Nisalak A, et al. Classification of dengue illness based on readily available  
252 laboratory data. Am J Trop Med Hyg. 2010;83(4):781-8.

- 253 106. Raza FA, Shafiq ur R, Ruqyya K, Jameel A, Ashraf S, Mazhar I, et al. Demographic and clinico-epidemiological features of dengue fever  
254 in Faisalabad, Pakistan. PLoS ONE. 2014;9(3).
- 255 107. Sirivichayakul C, Limkittikul K, Chanthavanich P, Jiwariyavej V, Chocejindachai W, Pengsaa K, et al. Dengue Infection in Children in  
256 Ratchaburi, Thailand: A Cohort Study. II. Clinical Manifestations. Plos Neglected Tropical Diseases. 2012;6(2).
- 257 108. Sharma K, Yadav A. Association of mean platelet volume with severity, serology & treatment outcome in dengue fever: Prognostic  
258 utility. Journal of Clinical and Diagnostic Research. 2015;9(11):EC01-EC3.
- 259 109. Thein TL, Wong J, Leo YS, Ooi EE, Lye D, Yeo TW. Association between increased vascular nitric oxide bioavailability and progression  
260 to dengue hemorrhagic fever in adults. Journal of Infectious Diseases. 2015;212(5):711-4.
- 261 110. Tissera H, Rathore APS, Wei Yee L, Pike BL, Warkentien TE, Farouk FS, et al. Chymase Level Is a Predictive Biomarker of Dengue  
262 Hemorrhagic Fever in Pediatric and Adult Patients. Journal of Infectious Diseases. 2017;216(9):1112-21.
- 263 111. Thanachartwet V, Desakorn V, Sahassananda D, Jittmittraphap A, Oer-areemitr N, Osothsomboon S, et al. Serum Procalcitonin and  
264 Peripheral Venous Lactate for Predicting Dengue Shock and/or Organ Failure: A Prospective Observational Study. PLoS Neglected Tropical  
265 Diseases. 2016;10 (8) (no pagination)(e0004961).
- 266 112. Thanachartwet V, Oer-areemitr N, Chamnanchanunt S, Sahassananda D, Jittmittraphap A, Suwannakudt P, et al. Identification of clinical  
267 factors associated with severe dengue among Thai adults: A prospective study. BMC Infectious Diseases. 2015;15(1).

- 268 113. Thanachartwet V, Wattanathum A, Oer-areemitr N, Jittmittraphap A, Sahassananda D, Monpassorn C, et al. Diagnostic accuracy of  
269 peripheral venous lactate and the 2009 WHO warning signs for identifying severe dengue in Thai adults: A prospective observational study. BMC  
270 Infectious Diseases. 2016;16 (1) (no pagination)(46).
- 271 114. Thanachartwet V, Wattanathum A, Sahassananda D, Wacharasint P, Chamnanchanunt S, Kyaw EK, et al. Dynamic Measurement of  
272 Hemodynamic Parameters and Cardiac Preload in Adults with Dengue: A Prospective Observational Study. Plos One. 2016;11(5).
- 273 115. Vasanwala FF, Puvanendran R, Fook-Chong S, Ng JM, Suhail SM, Lee KH. Could peak proteinuria determine whether patient with dengue  
274 fever develop dengue hemorrhagic/dengue shock syndrome?--a prospective cohort study. BMC Infectious Diseases. 2011;11:212.
- 275 116. Villar-Centeno LA, Díaz-Quijano FA, Martínez-Vega RA. Biochemical alterations as markers of dengue hemorrhagic fever. American  
276 Journal of Tropical Medicine and Hygiene. 2008;78(3):370-4.
- 277 117. García-Rivera EJ, Rigau-Pérez JG. Dengue severity in the elderly in Puerto Rico. Revista Panamericana de Salud Publica.  
278 2003;13(6):362-8.
- 279 118. Prasad D, Bhriuvanshi A. Clinical Profile, Liver Dysfunction and Outcome of Dengue Infection in Children: A Prospective Observational  
280 Study. The Pediatric infectious disease journal. 2019;02.
- 281 119. Chandrashekhar C, Balaji K, Vasudev PH, Panachiyil GM, Babu T. Estimation of serum neopterin level as an early marker for detecting  
282 severe dengue infection. Int J Pediatr Adolesc Med. 2019;6(4):151-4.

- 283 120. Elenga N, Celicourt D, Muanza B, Elana G, Hocquelet S, Tarer V, et al. Dengue in hospitalized children with sickle cell disease: A  
284 retrospective cohort study in the French departments of America. *Journal of Infection and Public Health*. 2019.
- 285 121. Goncalves BS, Nogueira RMR, Bispo de Filippis AM, Horta MAP. Factors predicting the severity of dengue in patients with warning signs  
286 in Rio de Janeiro, Brazil (1986-2012). *Trans R Soc Trop Med Hyg*. 2019;113(11):670-7.
- 287 122. Goncalves BS, Horta MAP, Acero PHC, Bochner R, Queiroz Lima MDR, de Araujo ES, et al. Dynamics of nonstructural glycoprotein-1 in  
288 dengue patients presenting with different clinical manifestations from 1986 to 2012 in Rio de Janeiro, Brazil. *Journal of Medical Virology*.  
289 2019;91(4):555-63.
- 290 123. Phuong NTN, Manh DH, Dumre SP, Mizukami S, Weiss LN, Van Thuong N, et al. Plasma cell-free DNA: a potential biomarker for early  
291 prediction of severe dengue. *Ann Clin Microbiol Antimicrob*. 2019;18(1):10.
- 292 124. Ta TV, Tran HT, Ha ONT, Nguyen XT, Tran VK, Pham HT, et al. The correlation of clinical and subclinical presentations with dengue  
293 serotypes and plasma viral load: The case of children with dengue hemorrhagic fever in Vietnam. *International Journal of Research in*  
294 *Pharmaceutical Sciences*. 2019;10(3):2578-85.
- 295 125. May WL, Kyaw MP, Blacksell SD, Pukrittayakamee S, Chotivanich K, Hanboonkunupakarn B, et al. Impact of glucose-6-phosphate  
296 dehydrogenase deficiency on dengue infection in Myanmar children. *PLoS ONE*. 2019;14 (1) (no pagination)(e0209204).
- 297 126. Nguyen Phung NT, Nguyen TTP, Bui TL, Nguyen TH, Tran DT. C-reactive protein in children with dengue fever in Vietnam. *International*  
298 *Journal of Research in Pharmaceutical Sciences*. 2019;10(3):2525-31.



- 299 127. Patra G, Mallik S, Saha B, Mukhopadhyay S. Assessment of chemokine and cytokine signatures in patients with dengue infection: A  
300 hospital-based study in Kolkata, India. *Acta Tropica*. 2019;190:73-9.
- 301 128. Wang WH, Lin CY, Chang K, Urbina AN, Assavalapsakul W, Thitithanyanont A, et al. A clinical and epidemiological survey of the largest  
302 dengue outbreak in Southern Taiwan in 2015. *International Journal of Infectious Diseases*. 2019;88:88-99.
- 303 129. Opasawatchai A, Amornsupawat P, Jiravejchakul N, Chan-In W, Spoerk NJ, Manopwisedjaroen K, et al. Neutrophil Activation and Early  
304 Features of NET Formation Are Associated With Dengue Virus Infection in Human. *Frontiers in Immunology*. 2018;9:3007.
- 305 130. Kularatnam GAM, Jasinge E, Gunasena S, Samaranayake D, Senanayake MP, Wickramasinghe VP. Evaluation of biochemical and  
306 haematological changes in dengue fever and dengue hemorrhagic fever in Sri Lankan children: a prospective follow up study. *BMC Pediatrics*.  
307 2019;19(1):87.
- 308 131. Agrawal VK, Saroj Kumar Prusty B, Santosh Reddy C, Reddy GKM, Agrawal RK, Bandaru VCSS. Clinical profile and predictors of Severe  
309 Dengue disease: A study from South India. *Caspian j*. 2018;9(4):334-40.
- 310 132. Athira PP, Jagan OA, Umadevi P, Pragnatha K, Veena PM. A Retrospective Study of Paediatric Dengue Cases in a Tertiary Care Hospital  
311 in Southern India. *Journal of Clinical and Diagnostic Research*. 2018;12(7):SC01-SC6.
- 312 133. Boillat-Blanco N, Klaassen B, Mbarack Z, Samaka J, Mlaganile T, Masimba J, et al. Dengue fever in Dar es Salaam, Tanzania: clinical  
313 features and outcome in populations of black and non-black racial category. *BMC Infectious Diseases*. 2018;18(1):644.

- 314 134. Lee IK, Huang CH, Huang WC, Chen YC, Tsai CY, Chang K, et al. Prognostic Factors in Adult Patients with Dengue: Developing Risk  
315 Scoring Models and Emphasizing Factors Associated with Death  $\leq 7$  Days after Illness Onset and  $\leq 3$  Days after Presentation. *Journal of Clinical*  
316 *Medicine*. 2018;7(11):28.
- 317 135. Low GKK, Papapreponis P, Isa RM, Gan SC, Chee HY, Te KK, et al. Geographical distribution and spatio-temporal patterns of  
318 hospitalization due to dengue infection at a leading specialist hospital in Malaysia. *Geospatial Health*. 2018;13(1):127-34.
- 319 136. Saniathi NKE, Rianto BUD, Juffrie M, Soetjningsih. The effect of overnutrition toward the risk of dengue shock syndrome in pediatric  
320 patient: in-depth investigation of sVCAM-1 and adiponectin level. *Bali Medical Journal*. 2018;7(1):244-8.
- 321 137. Srivastava G, Chhavi N, Goel A. Validation of Serum Aminotransferases Levels to Define Severe Dengue Fever in Children. *Pediatr*.  
322 2018;21(4):289-96.
- 323 138. Temprasertudee S, Thanachartwet V, Desakorn V, Keatkla J, Chantratita W, Kiertiburanakul S. A Multicenter Study of Clinical  
324 Presentations and Predictive Factors for Severe Manifestation of Dengue in Adults. *Japanese Journal of Infectious Diseases*. 2018;71(3):239-43.
- 325 139. Villamor E, Villar LA, Lozano-Parra A, Herrera VM, Herrán OF. Serum fatty acids and progression from dengue fever to dengue  
326 haemorrhagic fever/dengue shock syndrome. *Br J Nutr*. 2018;120(7):787-96.
- 327 140. Wakimoto MD, Camacho LAB, Gonin ML, Brasil P. Clinical and Laboratory Factors Associated with Severe Dengue: A Case-Control Study  
328 of Hospitalized Children. *Journal of Tropical Pediatrics*. 2018;64(5):373-81.

- 329 141. Masood KI, Jamil B, Rahim M, Islam M, Farhan M, Hasan Z. Role of TNF  $\alpha$ , IL-6 and CXCL10 in Dengue disease severity. Iranian Journal  
330 of Microbiology. 2018;10(3):202-7.
- 331 142. Wijeratne DT, Fernando S, Gomes L, Jeewandara C, Ginneliya A, Samarasekara S, et al. Quantification of dengue virus specific T cell  
332 responses and correlation with viral load and clinical disease severity in acute dengue infection. Plos Neglected Tropical Diseases.  
333 2018;12(10):16.
- 334 143. Zhang H, Xie ZW, Xie XS, Ou YY, Zeng WT, Zhou YP. A novel predictor of severe dengue: The aspartate aminotransferase/platelet count  
335 ratio index (APRI). Journal of Medical Virology. 2018;90(5):803-9.
- 336 144. Ralapanawa U, Alawattegama ATM, Gunrathne M, Tennakoon S, Kularatne SAM, Jayalath T. Value of peripheral blood count for dengue  
337 severity prediction. BMC Research Notes. 2018;11(1):400.
- 338 145. Mapalagamage M, Handunnetti S, Premawansa G, Thillainathan S, Fernando T, Kanapathippillai K, et al. Is Total Serum Nitrite and Nitrate  
339 (NOx) Level in Dengue Patients a Potential Prognostic Marker of Dengue Hemorrhagic Fever? Dis Markers. 2018;2018:5328681.
- 340 146. Hegazi MA, Bakarman MA, Alahmadi TS, Butt NS, Alqahtani AM, Aljedaani BS, et al. Risk Factors and Predictors of Severe Dengue in  
341 Saudi Population in Jeddah, Western Saudi Arabia: A Retrospective Study. Am J Trop Med Hyg. 2020;13:13.
- 342 147. Mapalagamage M, Handunnetti SM, Wickremasinghe AR, Premawansa G, Thillainathan S, Fernando T, et al. High levels of serum  
343 Angiopoietin 2 and Angiopoietin 2/1 ratio at critical stage of dengue hemorrhagic fever patients and their association with clinical and biochemical  
344 parameters. Journal of clinical microbiology. 2020;15.

- 345 148. Patra G, Saha B, Mukhopadhyay S. Study of serum VEGF levels in patients with severe dengue infection admitted in a tertiary care  
346 hospital in Kolkata. *Journal of Medical Virology*. 2019;91(10):1873-6.
- 347 149. Sani H, Syazana N, Izuan Z, Isa MR, Hanis M, Yazli M. Procalcitonin and clinical factors associated with severe dengue infection in  
348 hospitalized adults in Malaysia. *American Journal of Infectious Diseases*. 2019;15(4):103-10.
- 349 150. Mahmud MR, Zaman S, Naseem N, Iqbal N, Tanveer N, Khalid MA, et al. Comparison of Vitamin D Levels in Patients with Dengue  
350 Haemorrhagic Fever and Dengue Fever. *Journal of Rawalpindi Medical College*. 2018;22(2):92-5.

351

352 **Supplement Table 7.** Definitions of associated factors taken from the included studies in this systematic review  
 353 and meta-analysis

| Associated factors | Definition                                                                                                                                                                                                                                                                                                                                                                                 |
|--------------------|--------------------------------------------------------------------------------------------------------------------------------------------------------------------------------------------------------------------------------------------------------------------------------------------------------------------------------------------------------------------------------------------|
| Age                | Age of participants in year or month units according to medical records or history taking                                                                                                                                                                                                                                                                                                  |
| Sex                | Physical sex according to medical records or history taking                                                                                                                                                                                                                                                                                                                                |
| Nutritional status | <p>For children (<math>\leq 18</math> years old), weight for age based on local standardized guidelines or BMI-for-age <math>&gt;2</math> Z score according to WHO sex-specific growth reference for children.</p> <p>For adults (<math>&gt;18</math> years old) the BMI criterion was used, malnourished BMI <math>&lt; 18</math> and obese BMI <math>&gt; 30</math> kg/m<sup>2</sup></p> |
| Weight             | Weight of patients measured at presenting at hospitals or medical records                                                                                                                                                                                                                                                                                                                  |
| Mixed comorbidity  | Unspecific pre-existing comorbidities including cancer, asthma, chronic obstructive pulmonary disease, etc. according to medical records or history taking                                                                                                                                                                                                                                 |
| Hypertension       | Pre-existing hypertension disease according to medical records or history taking                                                                                                                                                                                                                                                                                                           |
| Diabetes mellitus  | Pre-existing diabetes mellitus according to medical records or history taking                                                                                                                                                                                                                                                                                                              |

|                               |                                                                                                                                                                                                                                                                                                  |
|-------------------------------|--------------------------------------------------------------------------------------------------------------------------------------------------------------------------------------------------------------------------------------------------------------------------------------------------|
| Renal disease                 | Pre-existing renal diseases excepting acute kidney injury on dengue episode according to medical records or history taking                                                                                                                                                                       |
| Cardiovascular disease        | Pre-existing cardiovascular disease including chronic heart failure, myocardial infarction according to medical records or history taking                                                                                                                                                        |
| Rash                          | Presence of unspecific rash during the first four days of the illness according to history taking or physical examinations                                                                                                                                                                       |
| Vomiting                      | Presence of vomiting with any episodes during the first four days of the illness according to history taking or physical examinations                                                                                                                                                            |
| Abdominal pain and tenderness | Presence of abdominal pain and tenderness with any episodes during the first four days of the illness according to history taking or physical examinations                                                                                                                                       |
| Headache                      | Presence of headache during the first four days of illness according to history taking                                                                                                                                                                                                           |
| Minor bleeding                | Presence of either mucosal or spontaneous bleeding that do not require blood transfusion and present during the first four days of illness. This includes skin bleeding (petechiae, ecchymosis, or purpura), mucosal bleeding (epistaxis, gum bleeding, or other sites), haematemesis or melena. |
| Positive tourniquet test      | Tourniquet test with the presence of $\geq 20$ petechiae per square inch.                                                                                                                                                                                                                        |

|                             |                                                                                                                                                                                                       |
|-----------------------------|-------------------------------------------------------------------------------------------------------------------------------------------------------------------------------------------------------|
| Immune status               | Secondary infection determined with the use of serological tests (i.e. either IgM or IgG ELISA during the first four days of illness or the convalescence phase.)                                     |
| Clinical fluid accumulation | Presence of fluid accumulation (i.e. either pleural effusion or ascites) during the first four days of illness according to chest X-ray, ultrasonography, or physical examination                     |
| Serotypes                   | Infecting dengue serotypes determined using patients' serum collected during the first four days of illness with conventional or real-time RT-PCR assays, or viral isolation by mosquito inoculation. |
| Viraemia levels             | Viral RNA levels were quantified using real-time PRC or quantitative RT-PCR assays in the patients' plasma specimens collected during the first four days of illness                                  |
| Platelet count              | The number of platelets during the first four days of illness. If there are reports of platelet count for more than one day, platelet count on day 3 of illness was chosen.                           |
| Leukocyte cell count        | The number of leukocytes during the first four days of illness. If there are reports of leukocyte count for more than one day, leukocyte count on day 3 of illness was chosen.                        |
| Haematocrit                 | Haematocrit detected during the first four days of illness. If there are reports of haematocrit for more than one day, haematocrit on day 3 of illness was chosen.                                    |

|                              |                                                                                                                                                                                 |
|------------------------------|---------------------------------------------------------------------------------------------------------------------------------------------------------------------------------|
| Aspartate transaminase (AST) | AST levels detected during the first four days of illness. If there are reports of AST on more than one day, AST on day 3 of illness was chosen.                                |
| Alanine transaminase (ALT)   | ALT levels detected during the first four days of illness. If there are reports of ALT on more than one day, ALT on day 3 of illness was chosen.                                |
| Serum albumin                | Serum albumin levels detected during the first four days of illness. If there are reports of serum albumin on more than one day, albumin levels on day 3 of illness was chosen. |



354

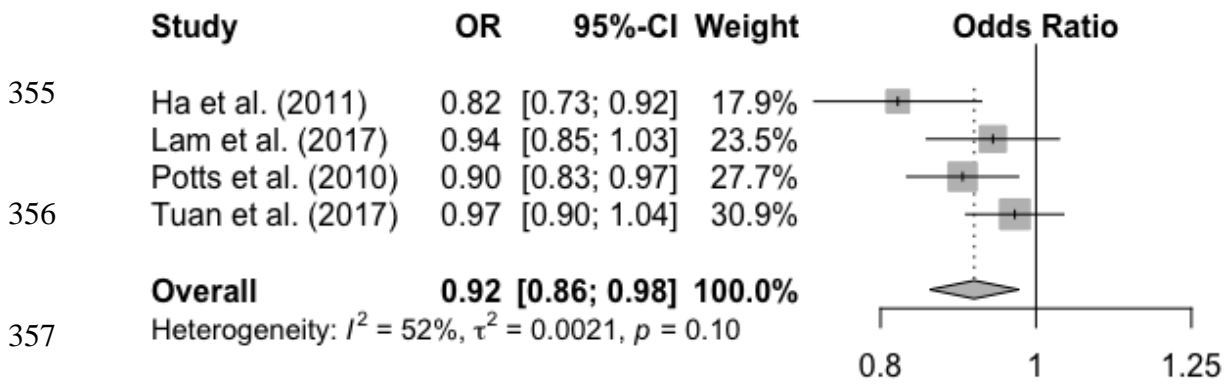

358 **Supplement Figure 1:** Forest plot of associations from multivariable models between age and severe progression.  
Four studies conducted among children ( $\leq 18$  years old) were included in the meta-analysis. The pooled OR was  
0.92 (95% CI (0.86, 0.98)) and  $I^2$  was 52%.

359

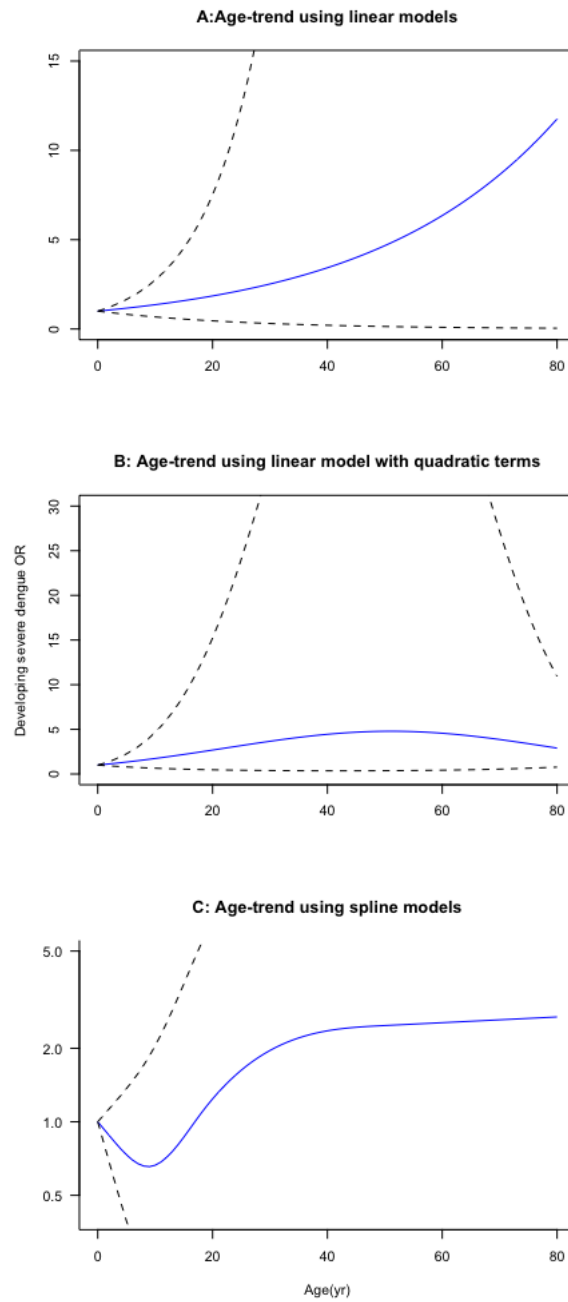

360

361 **Supplement Figure 2:** Association between odd ratios of severe progression (y-axis) and age (x-axis) from dose-  
 362 response meta-analysis based on linear models (A), linear models with quadratic terms (B), and spline models  
 363 with knots at age 2, 9, 18, and 50 (C). The blue solid line indicates the central estimate and the dotted line indicates  
 364 the 95% CI.

365

366

367 **Supplement Table 4: Model fitting parameters of linear and non-linear models estimating trends in the**  
368 **risk of developing severe manifestations with age in dose-response meta-analysis**

| Model                                             | AIC  | BIC  |
|---------------------------------------------------|------|------|
| Linear model                                      | 65.8 | 67.6 |
| Linear model with quadratic terms                 | 83.1 | 87.3 |
| Spline model with 4 knots at age 2, 9, 18, and 50 | 71.5 | 78.4 |

369

370

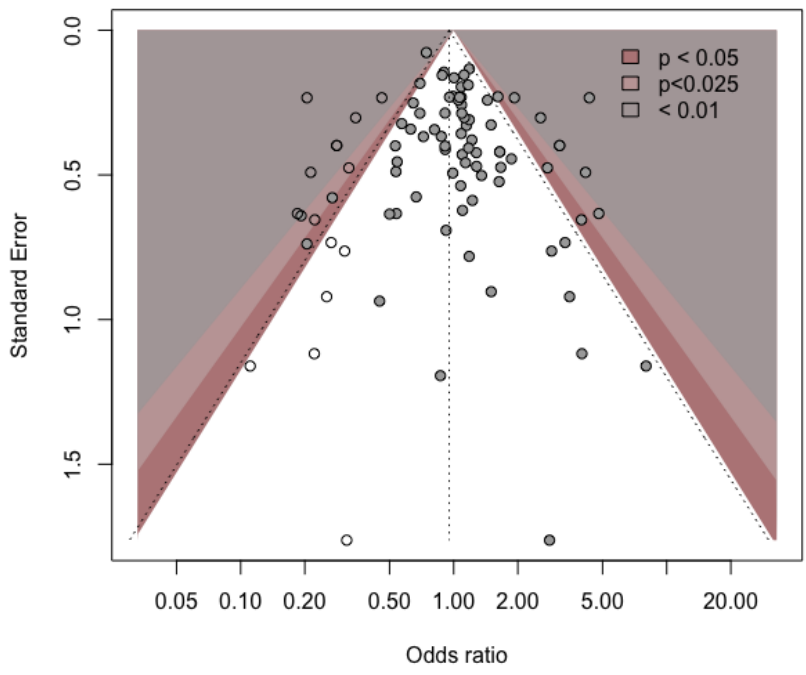

371

372 **Supplement Figure 3:** Funnel plot for association between sex and severe progression. The grey dots indicate  
 373 association of each study and the clear dots indicate the imputed associations.

374

| Study                                                  | OR          | 95%-CI              | Weight        |
|--------------------------------------------------------|-------------|---------------------|---------------|
| Carrasco et al. (2014)                                 | 1.75        | [1.07; 2.87]        | 19.6%         |
| Lam et al. (2017)                                      | 2.20        | [1.54; 3.15]        | 37.5%         |
| Sreenivasan et al. (2018)                              | 1.69        | [0.99; 2.88]        | 16.8%         |
| Tuan et al. (2017)                                     | 2.14        | [1.39; 3.29]        | 26.1%         |
| <b>Overall</b>                                         | <b>2.00</b> | <b>[1.60; 2.49]</b> | <b>100.0%</b> |
| Heterogeneity: $I^2 = 0\%$ , $\tau^2 = 0$ , $p = 0.79$ |             |                     |               |

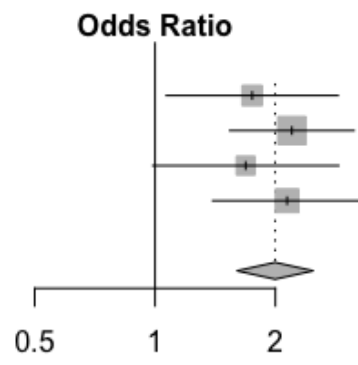

375

**Supplement Figure 4:** Forest plot of associations from multivariable models between vomiting and progression to severe disease. Four studies were included in the meta-analysis. The pooled OR was 2.00 (95% CI (1.60, 0.2.49)) and  $I^2$  was 0%.

376

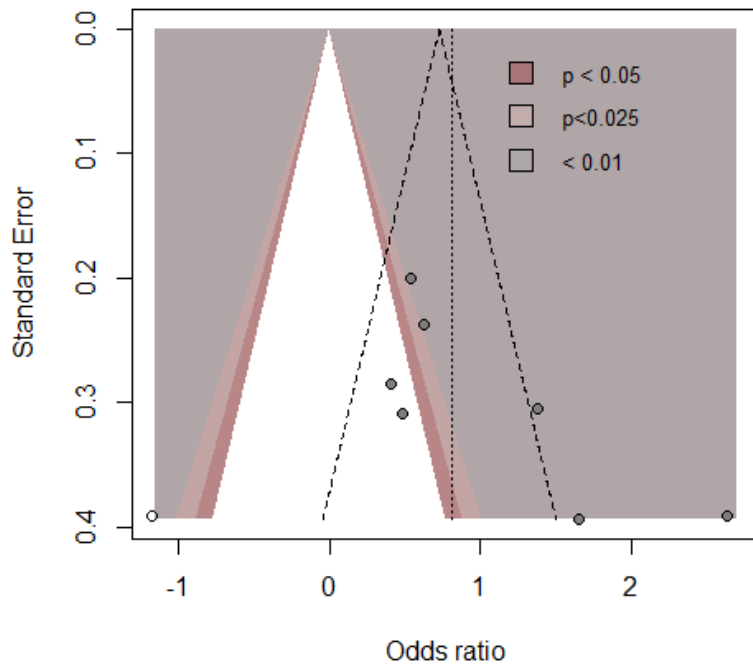

377

378 **Supplement Figure 5:** Funnel plot for association between AST and progression to severe disease. The grey dots  
379 indicate association of each study and the clear dots indicate the imputed associations. Dots on the coloured  
380 background indicate statistically significant ORs (red: p-value < 0.05, pink < 0.025 and brown p-value <0.01);  
381 dots on the white background indicate non-significant ORs (p-value  $\geq$  0.05).  
382

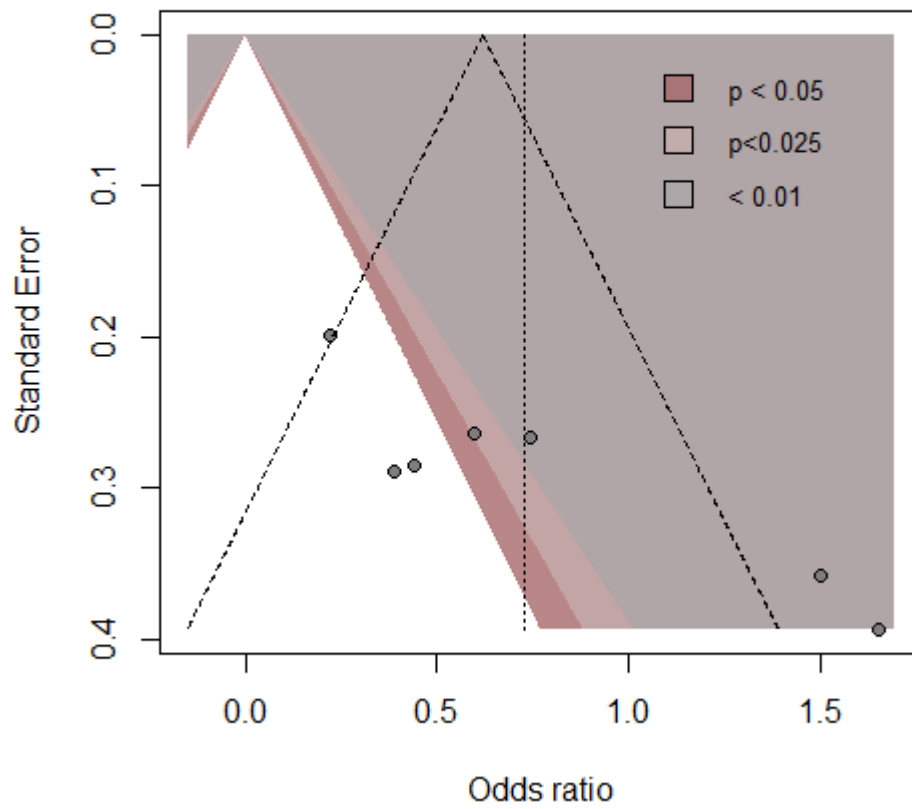

383

384 **Supplement Figure 6:** Funnel plot for association between ALT and progression to severe disease. The grey dots  
 385 indicate association of each study. While dots on the colour background indicate statistically significant ORs (red:  
 386 p-value < 0.05, pink < 0.025 and brown p-value < 0.01), on white indicates non-significant.

387

388

389

390

391

392

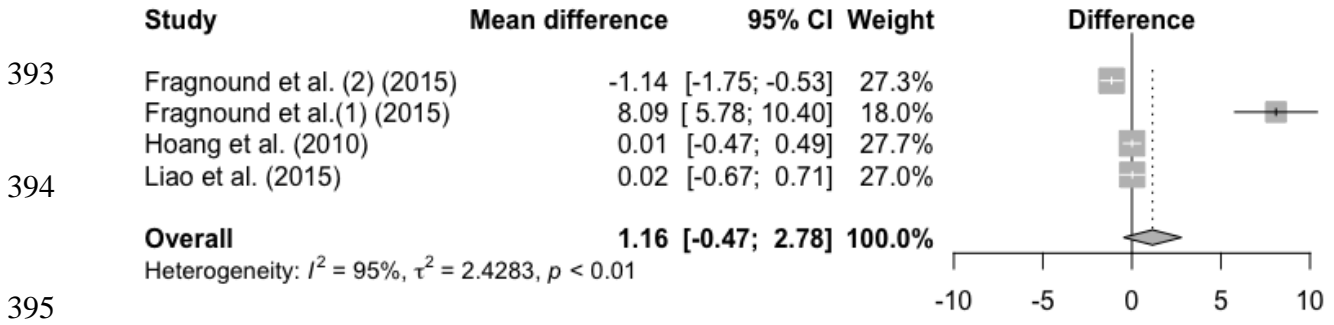

395

396 **Supplement Figure 7:** Forest plot of associations between viraemia and progression to severe disease. Four studies were included in the meta-analysis. The pooled OR was 1.16 (95% CI (-0.47 to 2.78)) and  $I^2$  was 95%.

397

398 **Supplement Table 7. Associated factors with progression to severe dengue illness reported in studies with**  
 399 **children and adults**

| Associated factors reported in studies with children during the febrile phase of disease | Associated factors reported in studies with adults during the febrile phase of disease |
|------------------------------------------------------------------------------------------|----------------------------------------------------------------------------------------|
| 1. Age                                                                                   | 1. Age                                                                                 |
| 2. Sex                                                                                   | 2. Sex                                                                                 |
| 3. Nutritional status                                                                    | 3. Mixed comorbidity                                                                   |
| 4. Weight                                                                                | 4. Diabetes mellitus                                                                   |
| 5. Presence of vomiting                                                                  | 5. Chronic kidney disease                                                              |
| 6. Presence of abdominal pain and tenderness                                             | 6. Cardiovascular disease                                                              |
| 7. Presence of bleeding                                                                  | 7. Platelet count                                                                      |
| 8. Platelet count                                                                        | 8. Haematocrit                                                                         |

|                             |                  |
|-----------------------------|------------------|
| 9. Haematocrit              | 9. Immune status |
| 10. Aminotransferase levels | 10. Serotype     |
| 11. Immune status           |                  |
| 12. Serotypes               |                  |

400

401 **Supplement Figure 8: Risk of bias in the included studies assessed by the Quality in Prognostic Studies**  
 402 **tool**

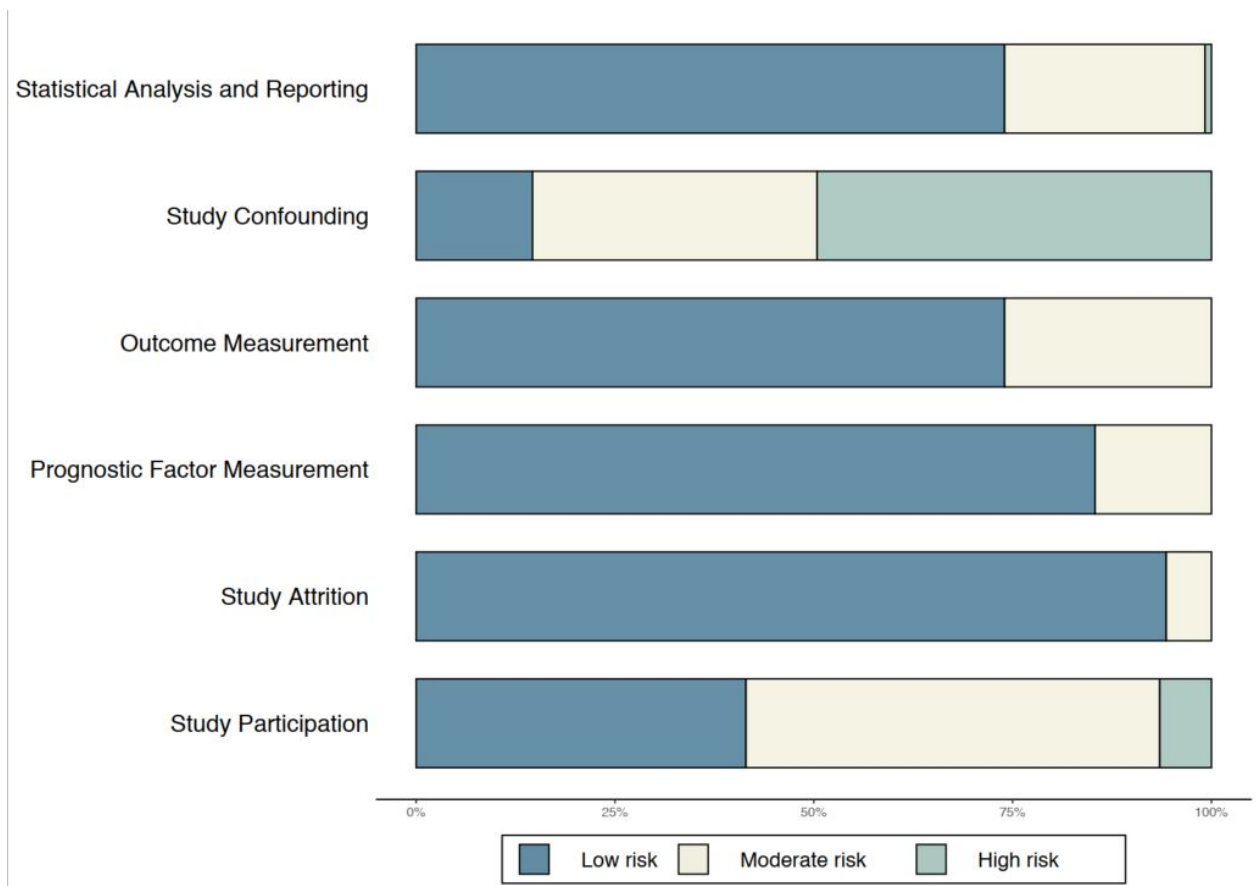

403
